# Supplementary material for: Isotopically enriched polymorphs of dysprosium single molecule magnets
Source: Royal Society of Chemistry journal article supplement (doi:10.1039/c7cc00317j), 2017-01-01
Supplement: c7cc00317j1.pdf [file c7cc00317j1.pdf]

## Supporting Informations for

### Isotopically Enriched Polymorphs of Dysprosium Single Molecule Magnets

Yosuke Kishi,<sup>a,b</sup> Fabrice Pointillart,<sup>\*b</sup> Bertrand Lefeuvre,<sup>b</sup> François Riobé,<sup>c</sup> Boris Le Guennic,<sup>b</sup> Stéphane Golhen,<sup>b</sup> Olivier Cador,<sup>\*b</sup> Olivier Maury,<sup>c</sup> Hideki Fujiwara,<sup>\*a</sup> Lahcène Ouahab<sup>b</sup>

<sup>a</sup> Department of Chemistry, Graduate School of Science, Osaka Prefecture University, 1-1 Gakuen-cho, Naka-ku, Sakai, Osaka 599-8531, Japan

<sup>b</sup> Institut des Sciences Chimiques de Rennes UMR 6226 CNRS-URI, Université de Rennes 1, 35042 Rennes Cedex, France.

<sup>c</sup> Laboratoire de Chimie de l'ENS-LYON-UMR 5182, 46 Allée d'Italie, 69364 Lyon Cedex 07.

Corresponding author's email: [fabrice.pointillart@univ-rennes1.fr](mailto:fabrice.pointillart@univ-rennes1.fr), [Olivier.cador@univ-rennes1.fr](mailto:Olivier.cador@univ-rennes1.fr), [hfuji@c.s.osakafu-u.ac.jp](mailto:hfuji@c.s.osakafu-u.ac.jp)

### Experimental Section

**General Procedures and Materials.** The precursors Ln(tta)<sub>3</sub>·2H<sub>2</sub>O (Ln=Eu<sup>III</sup>, Dy<sup>III</sup>, Er<sup>III</sup> and Yb<sup>III</sup>; tta<sup>-</sup>=2-thenoyltrifluoroacetate anion)<sup>1</sup>, <sup>164</sup>Dy(tta)<sub>3</sub>·2H<sub>2</sub>O,<sup>47</sup> 4,5-bis(methylthio)tetrathiafulvalene<sup>2</sup> and 2-(5-bromopyridin-2-yl)-1,3-benzothiazole<sup>3,4</sup> were synthesized following previously reported methods. All other reagents were purchased from Aldrich Co., Ltd. and used without further purification.

**Synthesis of 4-[6-(1,3-benzothiazol-2-yl)pyridin-3-yl]-4',5'-bis(methylthio)tetrathiafulvene (L).** To a stirred solution of 4,5-bis(methylthio)tetrathiafulvalene (315 mg, 1.06 mmol) in dry THF (30 mL) at -78°C under N<sub>2</sub> atmosphere was added <sup>n</sup>BuLi (1.6 M in hexane, 0.728 mL, 1.16 mmol) and stirring continued for 1 h at -78°C. Tributylstannyl chloride (0.316 mL, 1.16 mmol) was added, the mixture was stirred for a further 1 h at -78°C. The temperature was allowed to rise to room temperature over a period of 2 h, and the solvent was evaporated, water was added (50 mL) and the mixture was extracted with dichloromethane (3×30 mL). The combined organic extracts were washed with water (3×30 mL), dried (NaSO<sub>4</sub>), and the solvent was evaporated. Subsequently, dry toluene (20 mL) was added and N<sub>2</sub> gas bubbling was done for 20 min. After the bubbling, 2-(5-bromopyridin-2-yl)-1,3-benzothiazole (248 mg, 0.851 mmol) and Pd(PPh<sub>3</sub>)<sub>2</sub>Cl<sub>2</sub> (59.7 mg,

0.0851 mmol) were added and the mixture was heated overnight at 120°C. The solvent was evaporated. The resulting residue was purified by a column-chromatography on silica gel with CH<sub>2</sub>Cl<sub>2</sub>/*n*-hexane (2/1, v/v) as an eluent. Compound **L** was afforded as a purple solid (155 mg, 36%); m.p. 213-215°C (decomp.) R<sub>f</sub>=0.45 (dichloromethane/hexane=2/1)

<sup>1</sup>H NMR (400 MHz, CDCl<sub>3</sub>): δ 8.73 (d, *J*=2.0 Hz, 1H, pyridine), 8.36 (d, *J*=8.4 Hz, 1H, BZT), 8.10 (d, *J*=8.4 Hz, 1H, BZT), 7.96 (d, *J*=8.0 Hz, 1H, pyridine), 7.81 (dd, *J*=8.0 Hz, *J*=2.0 Hz, 1H, pyridine), 7.52 (dd, *J*<sub>1</sub>=8.0 Hz, *J*<sub>2</sub>=7.2 Hz, 1H, BZT) 7.43 (dd, *J*<sub>1</sub>=8.0 Hz, *J*<sub>2</sub>=7.2 Hz, 1H, BZT), 6.76 (s, 1H, TTF), 2.46 (s, 3H, SMe), 2.45 (s, 3H, SMe)

HRMS (FAB+, Matrix=3-Nitrobenzyl alcohol) (C<sub>20</sub>H<sub>12</sub>N<sub>2</sub>S<sub>7</sub>): Found 505.9202; Calcd. 505.9198

IR (KBr) ν 757,982, 1569, 3049, 3446 cm<sup>-1</sup>

### Synthesis of complexes

**[Ln(tta)<sub>3</sub>(L)]·CH<sub>2</sub>Cl<sub>2</sub> (Ln=Eu (Eu(t)) and Dy (Dy(t)))**. 0.02 mmol of Ln(tta)<sub>3</sub>·2H<sub>2</sub>O (17.0 mg for Ln=Eu and 17.2 mg for Ln=Dy) were dissolved in 10 mL of CH<sub>2</sub>Cl<sub>2</sub> and then added to a solution of 10 mL of CH<sub>2</sub>Cl<sub>2</sub> containing 10.4 mg of L (0.02 mmol). After 20 minutes of stirring, 30 mL of *n*-hexane were layered at room temperature in the dark. Slow diffusion following by slow evaporation leads to purple single crystals (prisms) which are suitable for X-ray studies. Yield 24.2 mg (86 %) and 8.2 mg (29 %) respectively for **Eu(t)** and **Dy(t)**. Anal. Calcd (%) for C<sub>45</sub>H<sub>28</sub>Cl<sub>2</sub>EuF<sub>9</sub>N<sub>2</sub>O<sub>6</sub>S<sub>10</sub>: C 38.38, H 1.99, N 1.99; found: C 38.59, H 2.06 N, 2.11. Anal. Calcd (%) for C<sub>45</sub>H<sub>28</sub>Cl<sub>2</sub>DyF<sub>9</sub>N<sub>2</sub>O<sub>6</sub>S<sub>10</sub>: C 38.09, H 1.98, N 1.98; found: C 38.22, H 2.01 N, 2.07.

**[Ln(tta)<sub>3</sub>(L)] (Ln=Dy (Dy(m)) and Y (Y(m)))**. 0.02 mmol of Ln(tta)<sub>3</sub>·2H<sub>2</sub>O (17.2 mg for Ln=Dy, 15.8 mg for Ln=Y, 17.3 mg for Ln=Er and 17.5 mg for Ln=Yb) were dissolved in 10 mL of CH<sub>2</sub>Cl<sub>2</sub> and then added to a solution of 10 mL of CH<sub>2</sub>Cl<sub>2</sub> containing 10.4 mg of L (0.02 mmol). After 20 minutes of stirring, 30 mL of *n*-hexane were layered at room temperature in the dark. Slow diffusion following by slow evaporation leads to purple single crystals (sticks) which are suitable for X-ray studies. Yield 17.1 mg (64 %) and 22.9 mg (91 %) respectively for **Dy(m)** and **Y(m)**. Anal. Calcd (%) for C<sub>44</sub>H<sub>26</sub>F<sub>9</sub>N<sub>2</sub>O<sub>6</sub>S<sub>10</sub>Dy: C 39.61, H 1.95, N 2.10; found: C 39.49, H 2.00 N, 2.05. Anal. Calcd (%) for C<sub>44</sub>H<sub>26</sub>F<sub>9</sub>N<sub>2</sub>O<sub>6</sub>S<sub>10</sub>Y: C 41.93, H 2.06, N 2.22; found: C 42.01, H 1.99 N, 2.11. Anal. Calcd (%) for C<sub>44</sub>H<sub>26</sub>F<sub>9</sub>N<sub>2</sub>O<sub>6</sub>S<sub>10</sub>Er: C 39.48, H 1.94, N 2.09; found: C 39.52, H 2.01 N, 2.13. Anal. Calcd (%) for C<sub>44</sub>H<sub>26</sub>F<sub>9</sub>N<sub>2</sub>O<sub>6</sub>S<sub>10</sub>Yb: C 39.31, H 1.94, N 2.08; found: C 38.99, H 1.67 N, 2.14.

**[Dy<sub>0.02</sub>Y<sub>0.98</sub>(tta)<sub>3</sub>(L)] (Dy<sub>0.02</sub>Y<sub>0.98</sub>(m))**. 1.0 mg of Dy(tta)<sub>3</sub>·2H<sub>2</sub>O (0.0012 mmol) and 46.3 mg of Y(tta)<sub>3</sub>·2H<sub>2</sub>O (0.0588 mmol) were dissolved in 10 mL of CH<sub>2</sub>Cl<sub>2</sub> and then added to a solution of 10 mL of CH<sub>2</sub>Cl<sub>2</sub> containing 31.2 mg of L (0.06 mmol). After 20 minutes of stirring, 30 mL of *n*-hexane were layered at room temperature in the dark. Slow diffusion following by slow evaporation leads to purple single crystals (sticks) which are suitable for X-ray studies. Yield 67.3 mg (89 %). Anal. Calcd (%) for C<sub>44</sub>H<sub>26</sub>F<sub>9</sub>N<sub>2</sub>O<sub>6</sub>S<sub>10</sub>Dy<sub>0.02</sub>Y<sub>0.98</sub>: C 41.60, H 2.05, N 2.21; found: C 41.59, H 2.00 N, 2.15.

**[<sup>164</sup>Dy<sub>0.07</sub>Y<sub>0.93</sub>(tta)<sub>3</sub>(L)] (<sup>164</sup>Dy<sub>0.07</sub>Y<sub>0.93</sub>(m))**. This compound was prepared from the experimental protocol of **(Dy<sub>0.02</sub>Y<sub>0.98</sub>(m))** starting from 2.6 mg <sup>164</sup>Dy(tta)<sub>3</sub>·2H<sub>2</sub>O instead of 1 mg of Dy(tta)<sub>3</sub>·2H<sub>2</sub>O. Yield 63.7 mg (84 %). Anal. Calcd (%) for C<sub>44</sub>H<sub>26</sub>F<sub>9</sub>N<sub>2</sub>O<sub>6</sub>S<sub>10</sub>Dy<sub>0.07</sub>Y<sub>0.93</sub>: C 41.80, H 2.06, N 2.22; found: C 41.79, H 2.03 N, 2.25.

**[<sup>164</sup>Dy<sub>0.05</sub>Eu<sub>0.95</sub>(tta)<sub>3</sub>(L)] (<sup>164</sup>Dy<sub>0.05</sub>Eu<sub>0.95</sub>(t))**. 2.6 mg of <sup>164</sup>Dy(tta)<sub>3</sub>·2H<sub>2</sub>O (0.003 mmol) and 48.5 mg of Eu(tta)<sub>3</sub>·2H<sub>2</sub>O (0.057 mmol) were dissolved in 10 mL of CH<sub>2</sub>Cl<sub>2</sub> and then added to a solution of 10 mL of CH<sub>2</sub>Cl<sub>2</sub> containing 31.2 mg of L (0.06 mmol). After 20 minutes of stirring, 30 mL of *n*-hexane were layered at room temperature in the dark. Slow diffusion following by slow evaporation leads to purple single crystals (prisms) which are suitable for X-ray studies. Yield 65.0 mg (77 %). Anal. Calcd (%) for C<sub>45</sub>H<sub>28</sub>Cl<sub>2</sub>F<sub>9</sub>N<sub>2</sub>O<sub>6</sub>S<sub>10</sub>Dy<sub>0.05</sub>Eu<sub>0.95</sub>: C 38.39, H 1.99, N 1.99; found: C 38.44, H 2.00 N, 2.04.

**Crystallography.** Single crystals of **Eu(t)**, **Dy(t)**, **Dy(m)** and **Y(m)** were mounted on a APEXII Bruker-AXS diffractometer (MoK $\alpha$  radiation source,  $\lambda=0.71073$  Å, T=150(2) K) for data collection, from the Centre de Diffractométrie (CDIFX), Université de Rennes 1, France. Structures were solved with a direct method using the SIR-97 program and refined with a full matrix least-squares method on F<sup>2</sup> using the SHELXL-97 program<sup>5</sup> for all the compounds. The cell and X-ray powder diffraction are performed for <sup>164</sup>Dy<sub>0.07</sub>Y<sub>0.93</sub>(m) and <sup>164</sup>Dy<sub>0.05</sub>Eu<sub>0.95</sub>(t). The wide angle X-ray diffraction pattern of the sample was recorded on a Bruker AXS diffractometer with mono-chromatized CuK $\alpha$  radiation ( $\lambda=1.5406$  Å), operating at 40 kV, 40 mA, with 0.0079° step size and a counting time of 358 ms per step, over a range of 3° < 2 $\theta$  < 80°, at room temperature. Crystallographic data are summarized in end notes. Complete crystal structure results as a CIF file including bond lengths, angles, and atomic coordinates are deposited as Supporting Information. CCDC numbers 1510233, 1510234, 1510236 and 1510237 are for **Eu(t)**, **Dy(t)**, **Dy(m)** and **Y(m)**, respectively.

**Physical Measurements.** The elementary analyses of the compounds were performed at the Centre Régional de Mesures Physiques de l'Ouest, Rennes. <sup>1</sup>H NMR was recorded on a Bruker Ascend 400 spectrometer. Chemical shifts are reported in parts per million referenced to TMS for <sup>1</sup>H NMR. Cyclic voltametry was carried out in CH<sub>2</sub>Cl<sub>2</sub> solution, containing 0.1 M N(C<sub>4</sub>H<sub>9</sub>)<sub>4</sub>PF<sub>6</sub> as supporting electrolyte. Voltamograms were recorded at 100 mV s<sup>-1</sup> at a platinum disk electrode. The potentials were measured *versus* a saturated calomel electrode (SCE). The dc magnetic susceptibility measurements were performed on solid polycrystalline sample with a Quantum Design MPMS-XL SQUID magnetometer between 2 and 300 K in an applied magnetic field of 200 Oe in the 2-20 K temperature range, 2 kOe between 20 and 80 K and 10 kOe between 80 and 300 K. These measurements were all corrected for the diamagnetic contribution as calculated with Pascal's constants.

**Computational Details.** Wavefunction-based calculations were carried out on **Dy(t)** and **Dy(m)** by using the SA-CASSCF/RASSI-SO approach, as implemented in the MOLCAS quantum chemistry package (versions 8.0).<sup>6</sup> In this approach, the relativistic effects are treated in two steps on the basis of the Douglas–Kroll Hamiltonian. First, the scalar terms were included in the basis-set generation and were used to determine the spin-free wavefunctions and energies in the complete active space self-consistent field (CASSCF) method.<sup>7</sup> Next, spin-orbit coupling was added within the restricted-active-space-state-interaction (RASSI-SO) method, which uses the spin-free wavefunctions as basis states.<sup>8,9</sup> The resulting wavefunctions and energies are used to compute the magnetic properties and g-tensors of the lowest states from the energy spectrum by using the pseudo-spin  $S=1/2$  formalism in the SINGLE-ANISO routine.<sup>10</sup> Cholesky decomposition of the bielectronic integrals was employed to save disk space and speed-up the calculations.<sup>11</sup> The atomic positions were extracted from the X-ray crystal structures. Only the H and F atom positions were optimized using the DFT procedure described previously. The active space of the self-consistent field (CASSCF) method consisted of the nine 4f electrons of the Dy<sup>III</sup> ion spanning the seven 4f orbitals, i.e. CAS(9,7)SCF. State-averaged CASSCF calculations were performed for all of the sextets (21 roots), all of the quadruplets (224 roots), and 300 out of the 490 doublets (due to software limitations) of the Dy<sup>III</sup> ion. Twenty-one sextets, 128 quadruplets, and 107 doublets were mixed through spin-orbit coupling in RASSI-SO. All atoms were described by ANO-RCC basis sets.<sup>12-14</sup> The following contractions were used: [8s7p4d3f2g1h] for Dy, [4s3p2d] for the O and N atoms directly coordinated to Dy, [4s3p] for the S atoms, [3s2p] for the C and F atoms and [2s] for the H atoms.

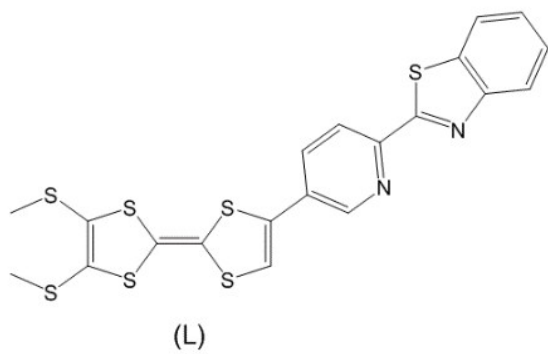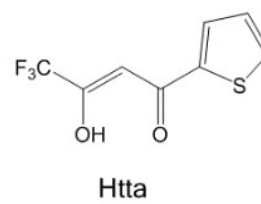

**Scheme S1.** Molecular structure of **L** and Htta.

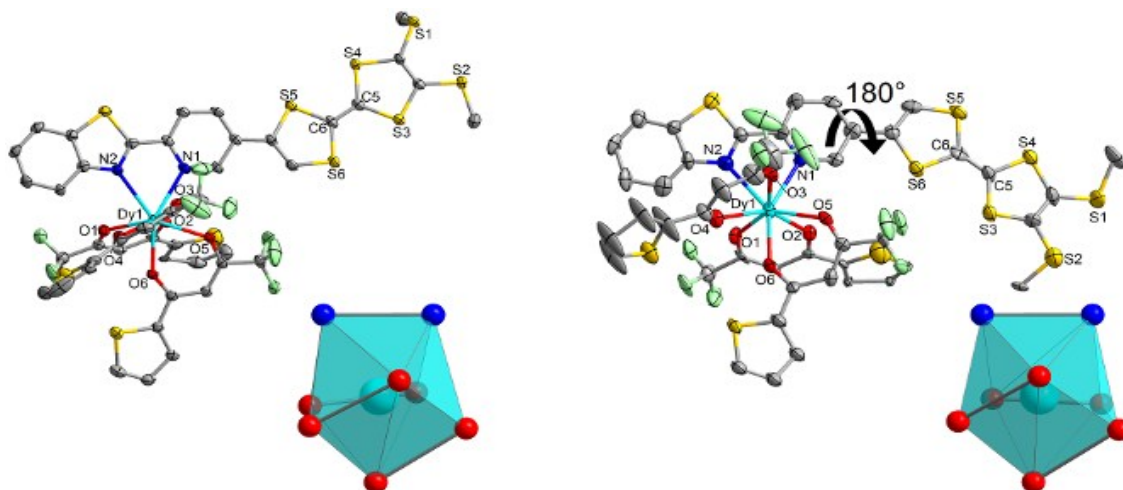

**Figure S1.** Representation of the complex  $[\text{Dy}(\text{tta})_3\text{L}]$  in **Dy(t)** (left) and **Dy(m)** (right) with the coordination polyhedra in both structures (cyan, Dy; green, F; yellow, S; gray, C; blue, N; red, O). Thick lines on edges of polyhedra feature the atoms coming from the same bidentate ligand. ORTEP views of the asymmetric unit show thermal ellipsoids drawing at 30% probability. Hydrogen atoms and  $\text{CH}_2\text{Cl}_2$  molecule of crystallisation are omitted for clarity.

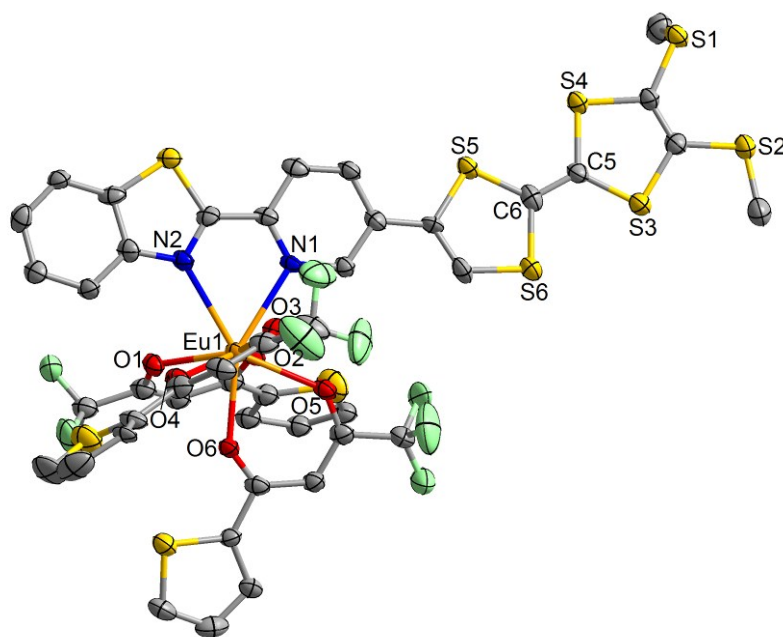

**Figure S2.** ORTEP view of the asymmetric unit for **Eu(t)**. Thermal ellipsoids are drawn at 30% probability. Hydrogen atoms and  $\text{CH}_2\text{Cl}_2$  molecule of crystallisation are omitted for clarity.

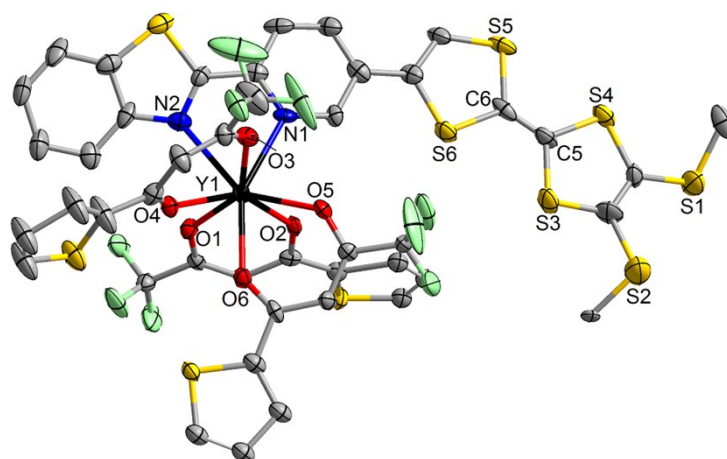

**Figure S3.** ORTEP view of the asymmetric unit for **Y(m)**. Thermal ellipsoids are drawn at 30% probability. Hydrogen atoms are omitted for clarity.

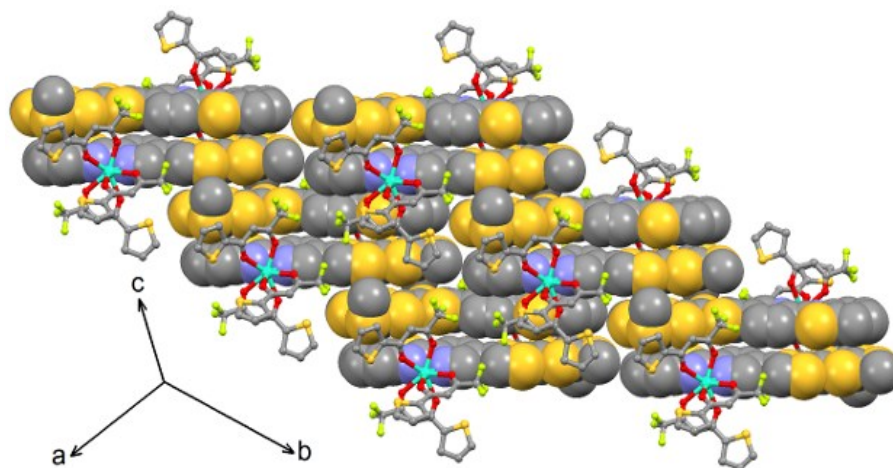

**Figure S4.** Crystal packing of **Dy(t)**. Hydrogen atoms and  $\text{CH}_2\text{Cl}_2$  molecule of crystallisation are omitted for clarity. Donor-Donor (D-D) interactions between the TTF cores ( $\text{S}2 \cdots \text{S}6 = 3.860 \text{ \AA}$  and  $\text{S}3 \cdots \text{S}6 = 3.856 \text{ \AA}$ ), Acceptor-Acceptor (A-A) interactions between the benzothiazole-2-pyridine moieties ( $\text{S}7 \cdots \text{S}7 = 3.820 \text{ \AA}$ ), D-A interactions through  $\pi$ - $\pi$  stacking and finally short  $\text{S} \cdots \text{S}$  contacts are identified between the TTF core and the thiophene ring of the  $\text{tta}^-$  anion ( $\text{S}2 \cdots \text{S}8 = 3.488 \text{ \AA}$ ).

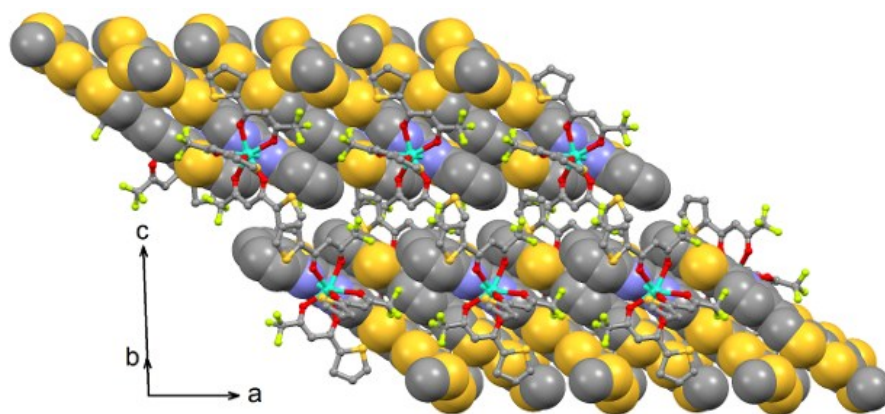

**Figure S5.** Crystal packing of **Dy(m)**. Hydrogen atoms are omitted for clarity. The crystal packing of **Dy(m)** is sensibly different compared to the one of **Dy(t)** due to the rotation of **L** (Fig. S5). The ligands are now packed along the *a* axis through the S2...S5=3.731 Å contacts while the 1D organic networks interact through S...S contacts between the thiomethyl groups and the thiophene rings of tta<sup>-</sup> anions (S1...S10=3.730 Å and S2...S10=3.746 Å).

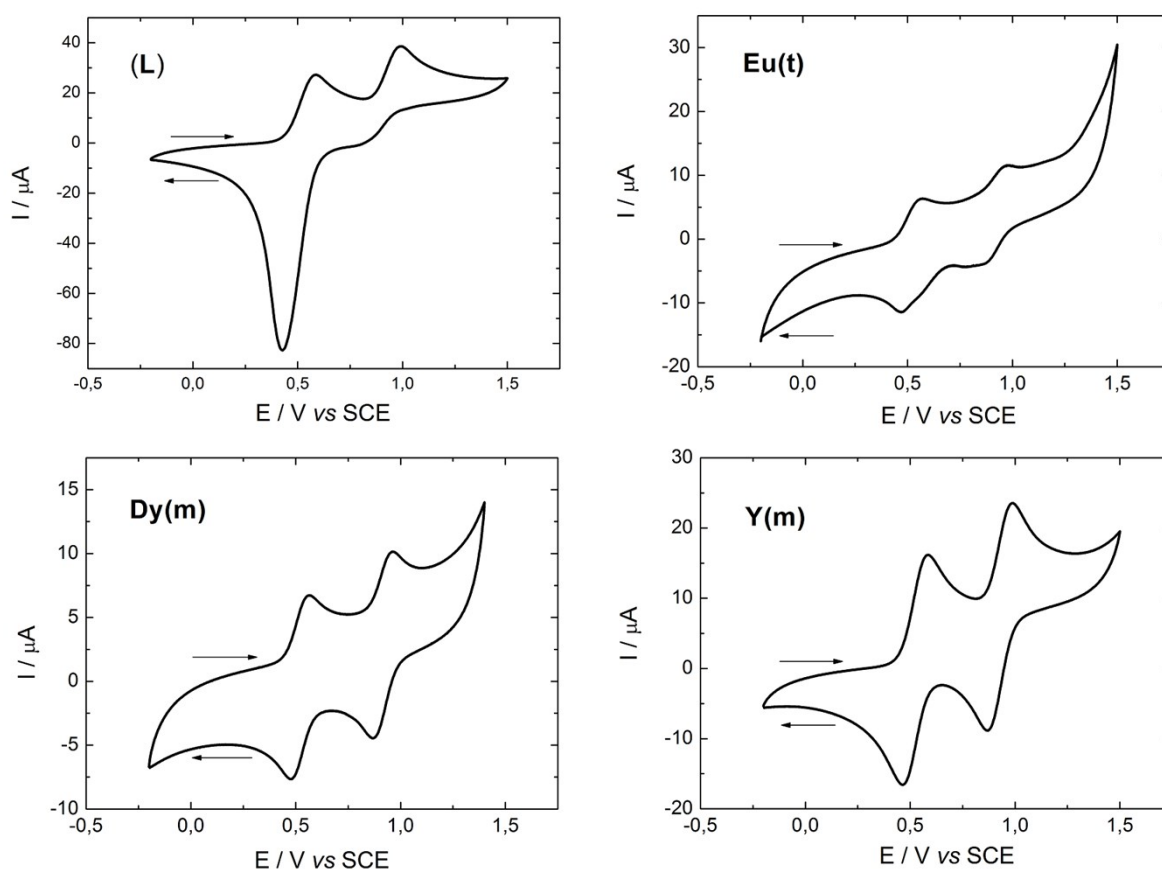

**Figure S6.** Cyclic voltammograms of the ligand **L** and representative complexes in CH<sub>2</sub>Cl<sub>2</sub> at a scan rate of 100 mV.s<sup>-1</sup>. The potentials were measured versus a saturated calomel electrode (SCE); Pt wire as the counter electrodes.

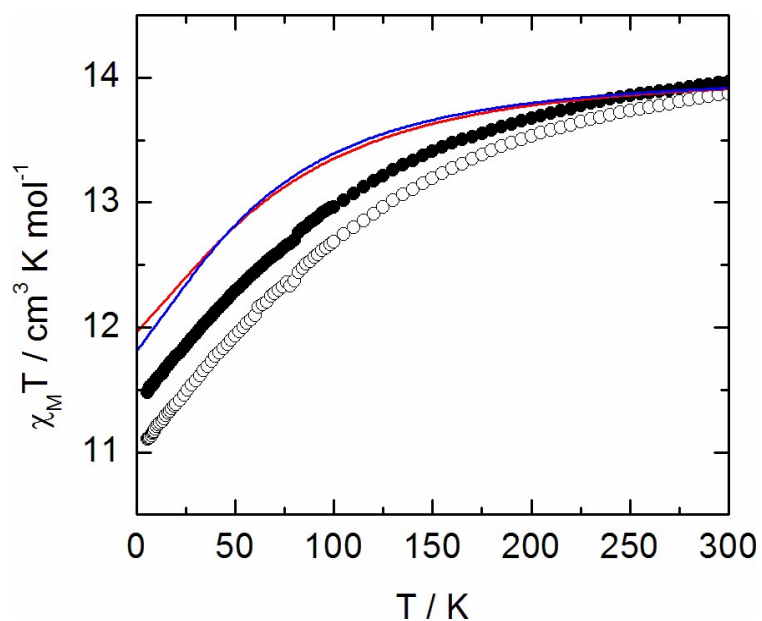

**Figure S7.** Temperature dependences of  $\chi_M T$  for pelletized samples of **Dy(t)** (full symbols) and **Dy(m)** (empty symbols) with the calculated curves in red and blue for **Dy(t)** and **Dy(m)**, respectively.

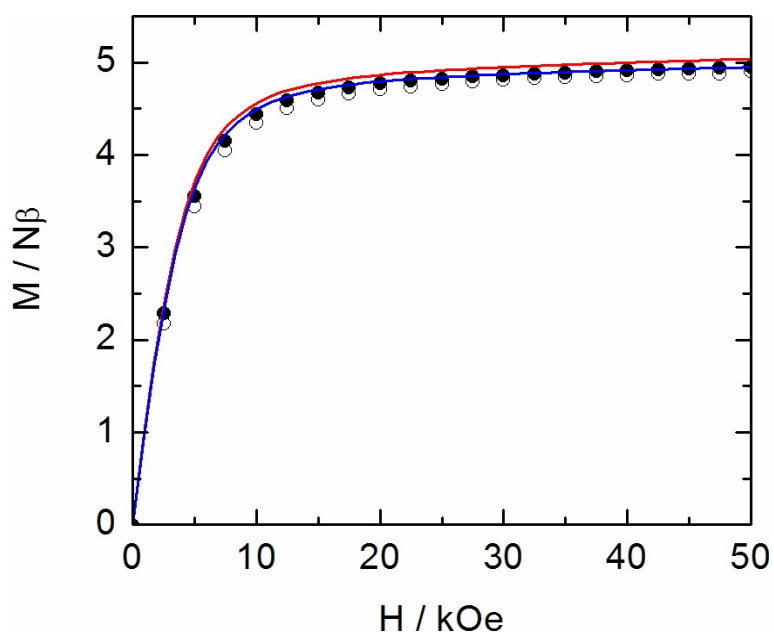

**Figure S8.** Magnetic field dependences of the magnetization at 2 K for pelletized samples of **Dy(t)** (full symbols) and **Dy(m)** (empty symbols) with the calculated curves in red and blue for **Dy(t)** and **Dy(m)**, respectively.



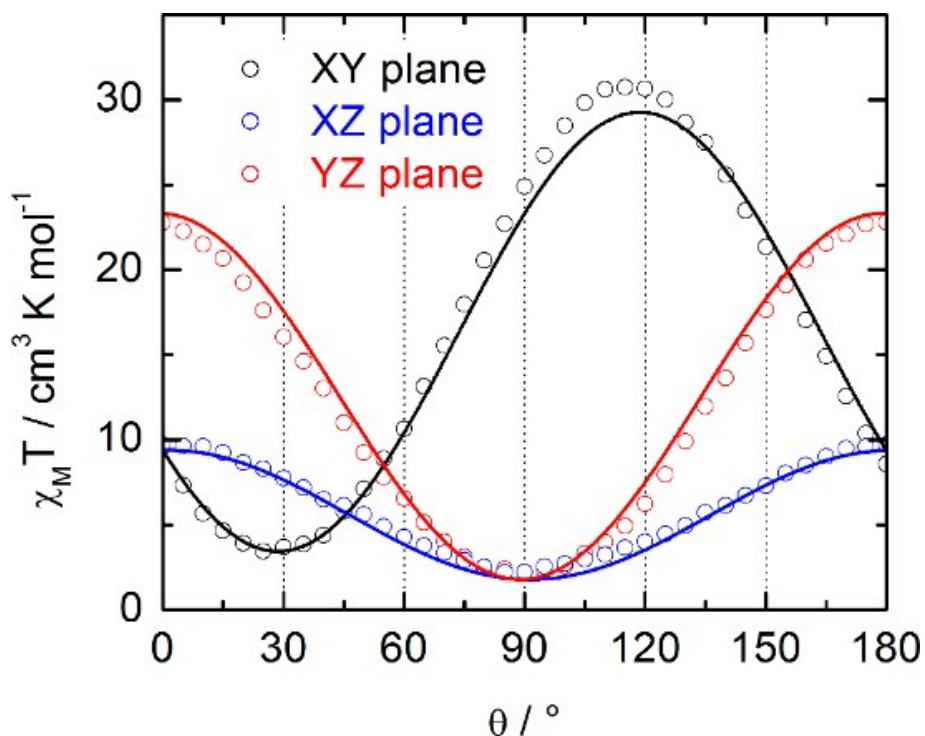

**Figure S9.** Angular dependence of  $\chi_M T$  of oriented single crystals of **Dy(t)** rotating in three perpendicular planes with  $H=1$  kOe at 2 K (see ESI for plane definitions). Best fitted curves in full lines.

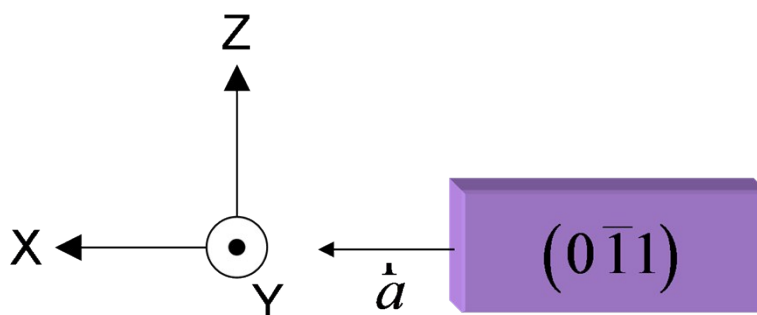

**Figure S10.** Oriented single crystal of **Dy(t)** with the XYZ crystal reference frame.

Susceptibility tensor in the crystal frame (XYZ):

$$\chi_M T = \begin{pmatrix} 9.388 & -10.87 & 0.186 \\ -10.87 & 23.32 & -0.396 \\ 0.186 & -0.396 & 1.793 \end{pmatrix} \text{cm}^3 \text{K mol}^{-1}$$

Principal values and direction of the susceptibility tensor in the XYZ crystal frame:

$$\chi_{xx}T \begin{pmatrix} 0.877 \\ 0.480 \\ -0.016 \end{pmatrix} = 3.44, \chi_{yy}T \begin{pmatrix} 0.480 \\ -0.877 \\ 0.016 \end{pmatrix} = 29.27, \chi_{zz}T \begin{pmatrix} -0.007 \\ -0.022 \\ -0.999 \end{pmatrix} = 1.79 \text{ cm}^3 \text{ K mol}^{-1}$$

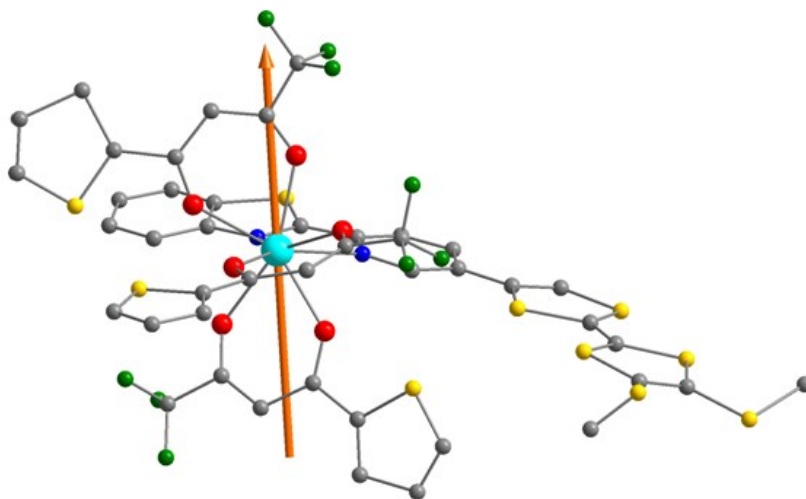

**Figure S11.** Representation of the crystallographic structure of [Dy(tta)<sub>3</sub>L] in **Dy(m)** with the theoretical magnetic anisotropy axis in orange. H atoms and solvent molecule have been omitted for clarity in both representations.

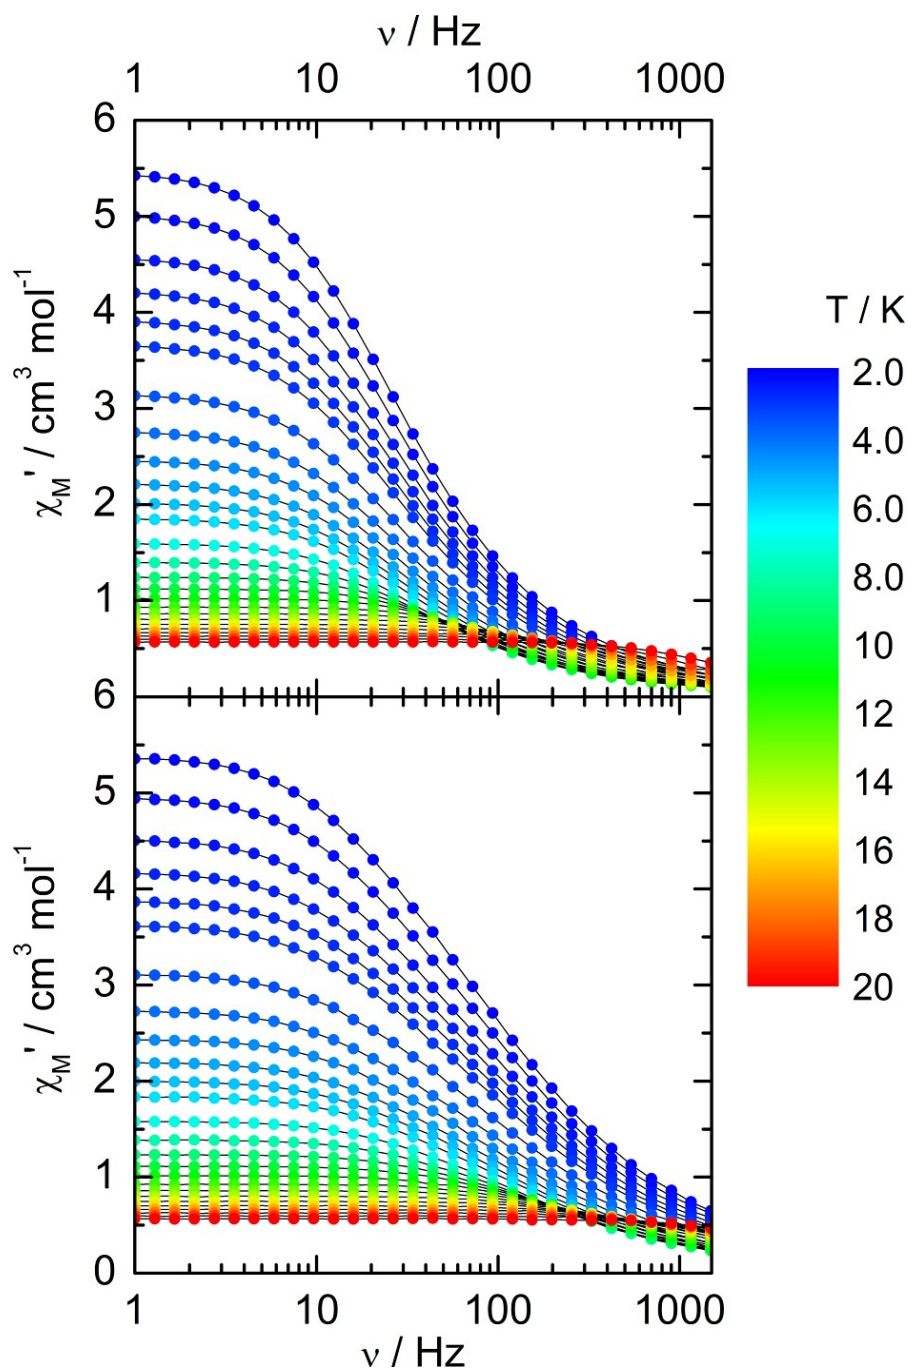

**Figure S12.** (top) Frequency dependence of the in-phase component,  $\chi_M'$ , of the ac susceptibility between 2 and 20 K for **Dy(t)**. (bottom) Frequency dependence of the in-phase component,  $\chi_M'$ , of the ac susceptibility between 2 and 20 K for **Dy(m)**.

Extended Debye model.

$$\chi' = \chi_S + (\chi_T - \chi_S) \frac{1 + (\omega\tau)^{1-\alpha} \sin\left(\alpha \frac{\pi}{2}\right)}{1 + 2(\omega\tau)^{1-\alpha} \sin\left(\alpha \frac{\pi}{2}\right) + (\omega\tau)^{2-2\alpha}}$$

$$\chi'' = (\chi_T - \chi_S) \frac{(\omega\tau)^{1-\alpha} \cos\left(\alpha \frac{\pi}{2}\right)}{1 + 2(\omega\tau)^{1-\alpha} \sin\left(\alpha \frac{\pi}{2}\right) + (\omega\tau)^{2-2\alpha}}$$

With  $\chi_T$  the isothermal susceptibility,  $\chi_S$  the adiabatic susceptibility,  $\tau$  the relaxation time and  $\alpha$  the empiric parameter which describes the distribution of the relaxation time. For SMM with only one relaxing object  $\alpha$  is close to zero. The extended Debye model was applied to fit simultaneously the experimental variations of  $\chi'$  and  $\chi''$  with the frequency  $f$  of the oscillating field ( $\omega = 2\pi\nu$ ). Typically, only the temperatures for which a maximum on the  $\chi''$  vs.  $\nu$  curves have been considered (see figure here below for an example). The best fitted parameters  $\tau$ ,  $\alpha$ ,  $\chi_T$ ,  $\chi_S$  are listed in Tables S6 and S7 with the coefficient of determination  $R^2$ .

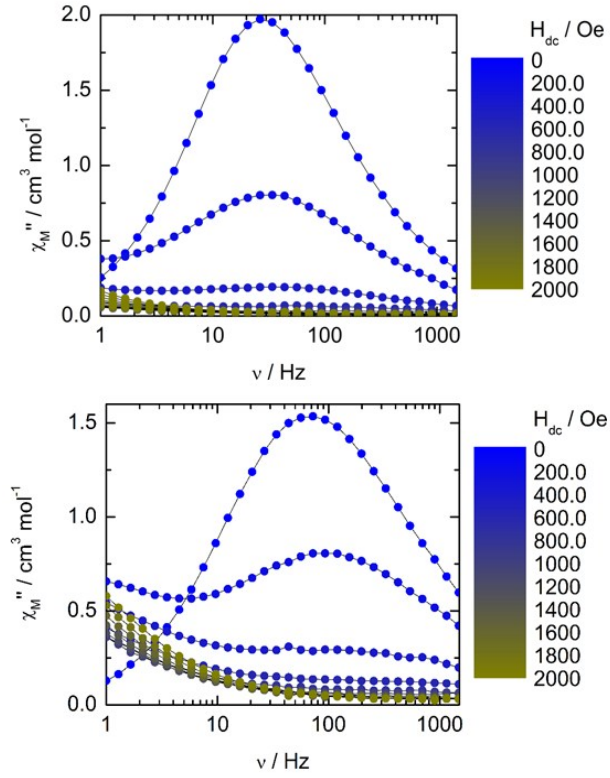

**Figure S13.** (top) Frequency dependence of the out-of-phase component,  $\chi_M''$ , of the ac susceptibility at 2 K for **Dy(t)** (top) and **Dy(m)** (bottom) as a function of the external field.

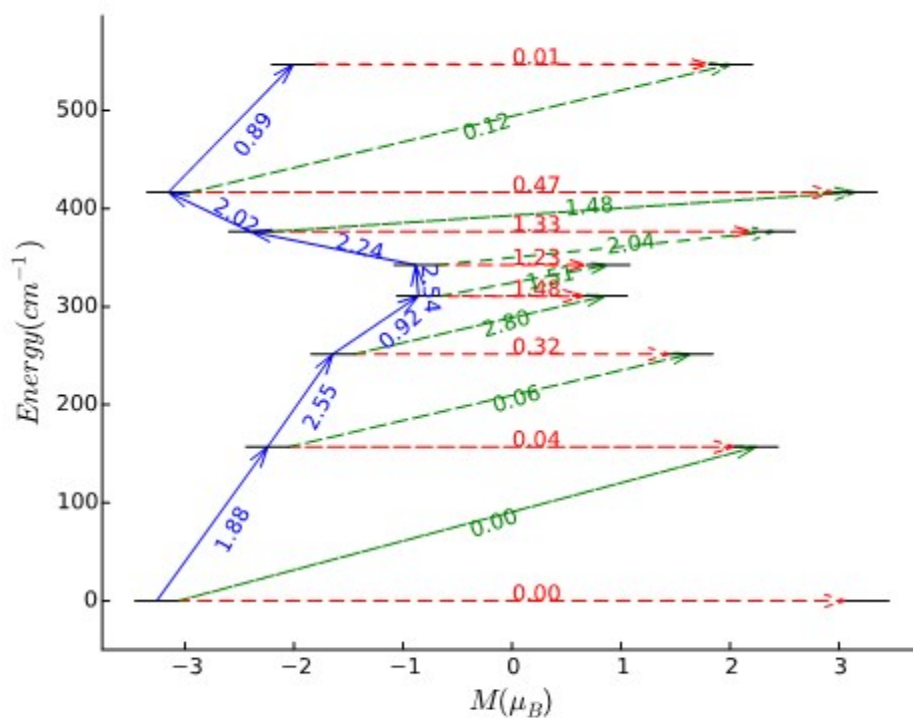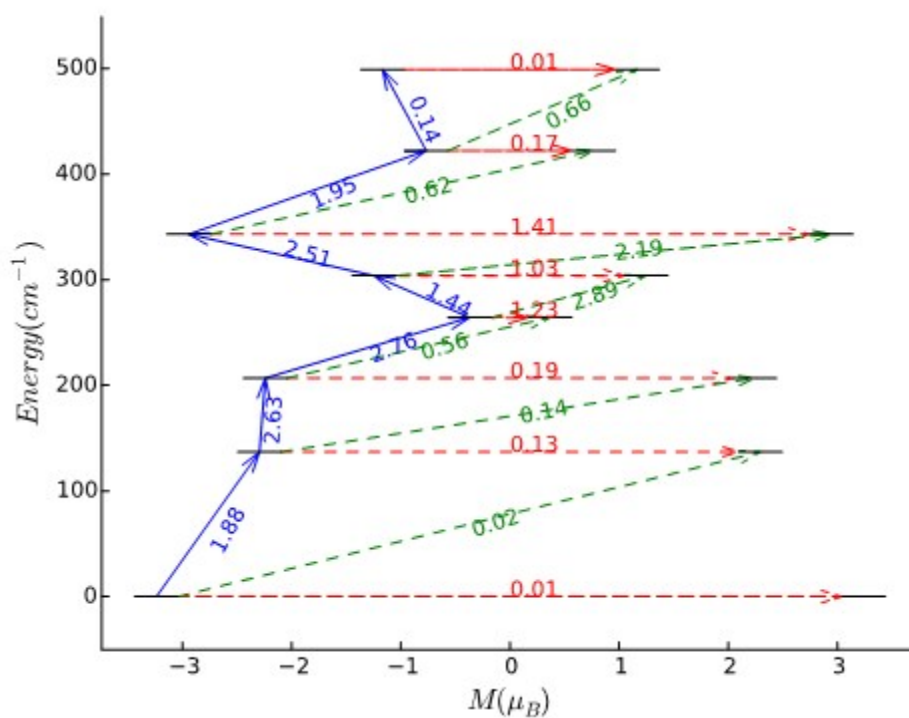

**Figure S14.** Magnetization blocking barrier of **Dy(t)** (top) and **Dy(m)** (bottom). The black lines represent components of the ground-state multiplet, while the arrows connecting them represent the relaxation paths. The number at each path is the average transition dipole moment.

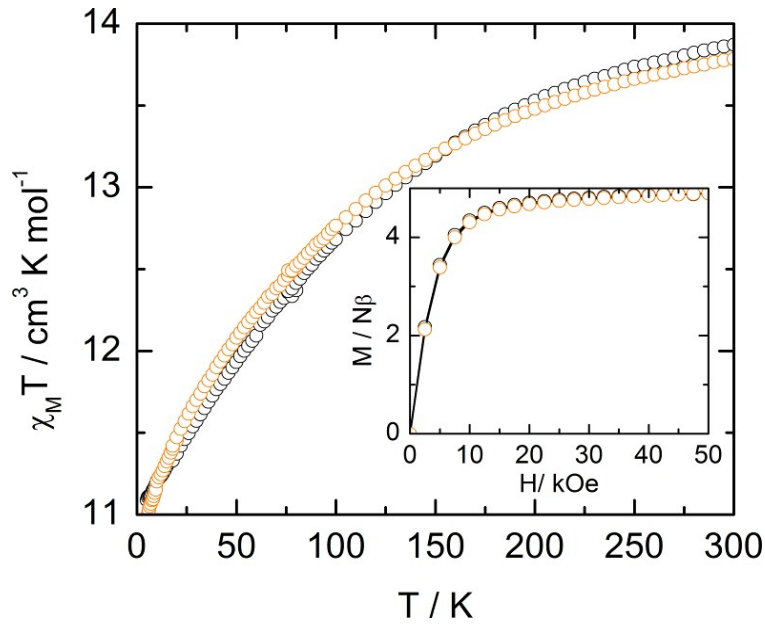

**Figure S15.** Temperatures dependences of  $\chi_M T$  for pelletized samples of **Dy(m)** (black) and  $^{164}\text{Dy(m)}$  (orange). Inset: Magnetic field dependences of the magnetization at 2 K for pelletized samples of **Dy(m)** (black) and  $^{164}\text{Dy(m)}$  (orange).

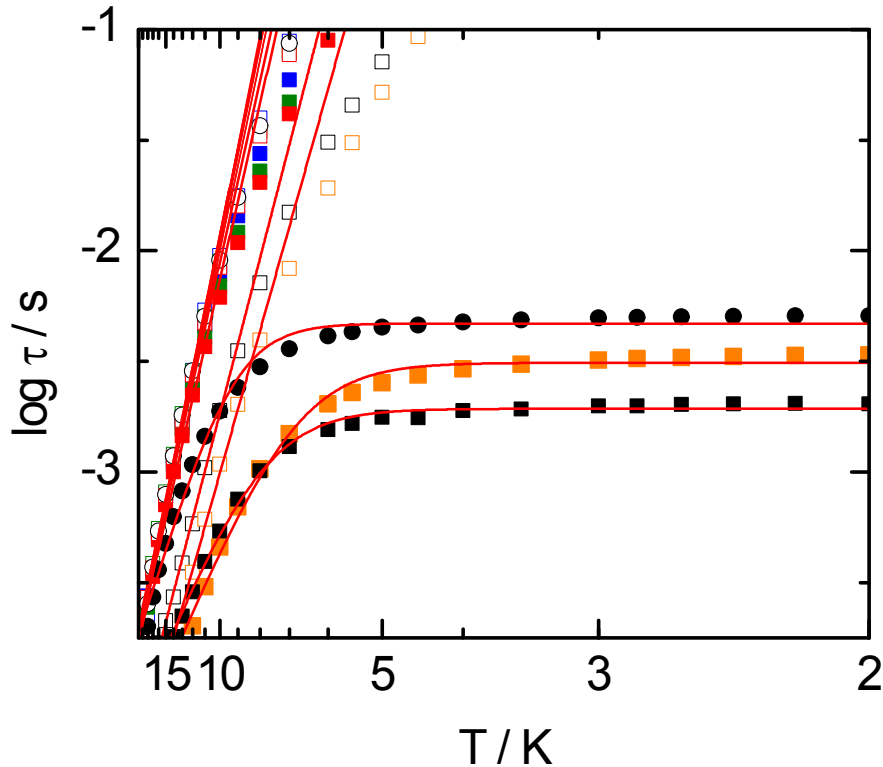

**Figure S16.** Log scale plots of the temperature dependence of the relaxation of the magnetic moment in **Dy(m)** (black squares), **Dy(t)** (black circles),  $^{164}\text{Dy(m)}$  (orange),  $\text{Dy}_{0.02}\text{Y}_{0.98}(\text{m})$  (blue),  $^{164}\text{Dy}_{0.07}\text{Y}_{0.93}(\text{m})$  (olive) and  $^{164}\text{Dy}_{0.05}\text{Eu}_{0.95}(\text{t})$  (red) at zero external field (full symbols) and at 1 kOe (empty symbols). Red lines correspond to the best-fitted curves with Arrhenius or modified Arrhenius laws (see text).

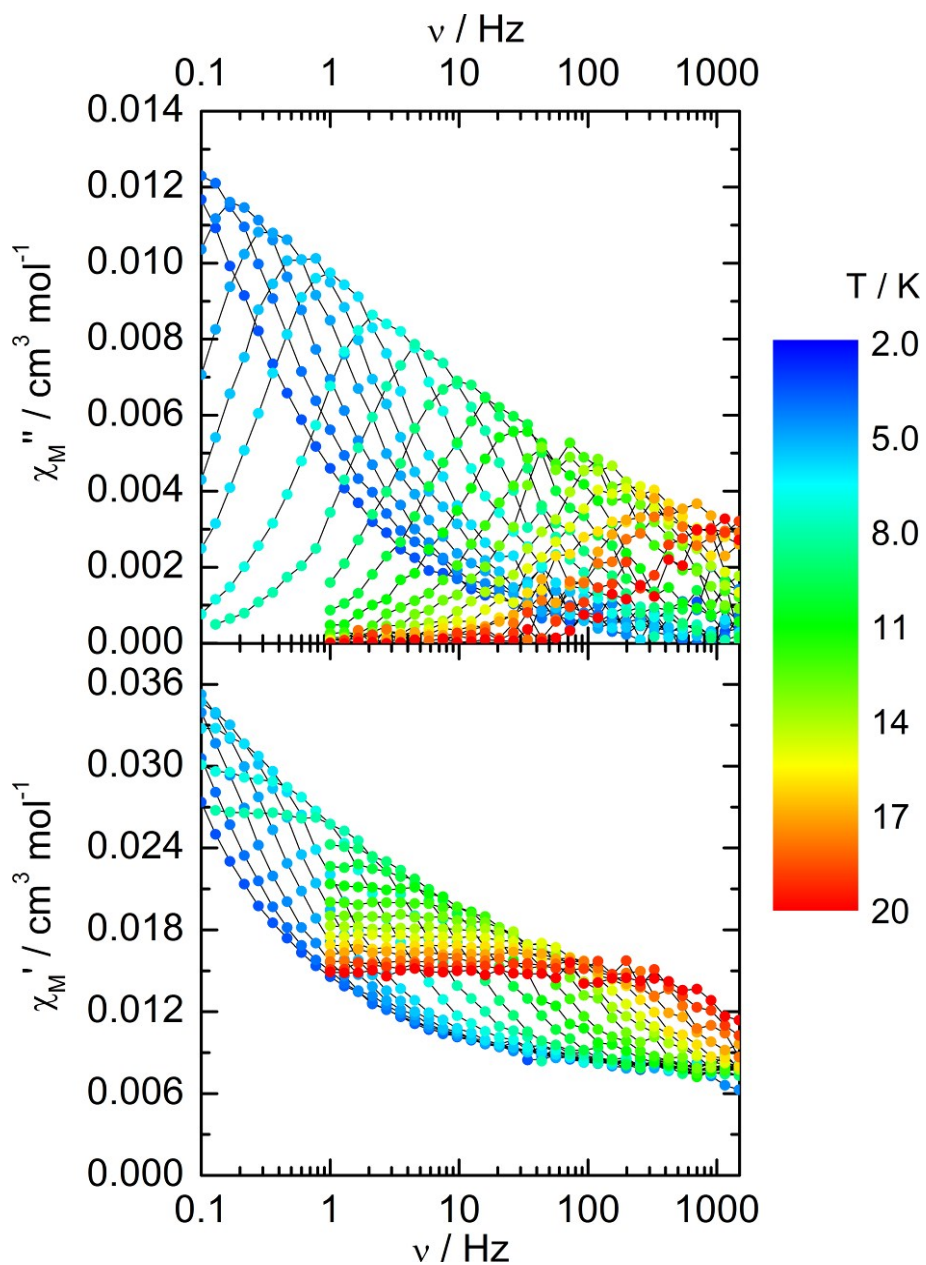

**Figure S17.** Frequency dependences of the in-phase,  $\chi_M'$  (bottom), and out-of-phase,  $\chi_M''$  (top), components of the ac susceptibility between 3.5 and 18 K for  $\text{Dy}_{0.02}\text{Y}_{0.98}(\mathbf{m})$  measured at zero external dc field.



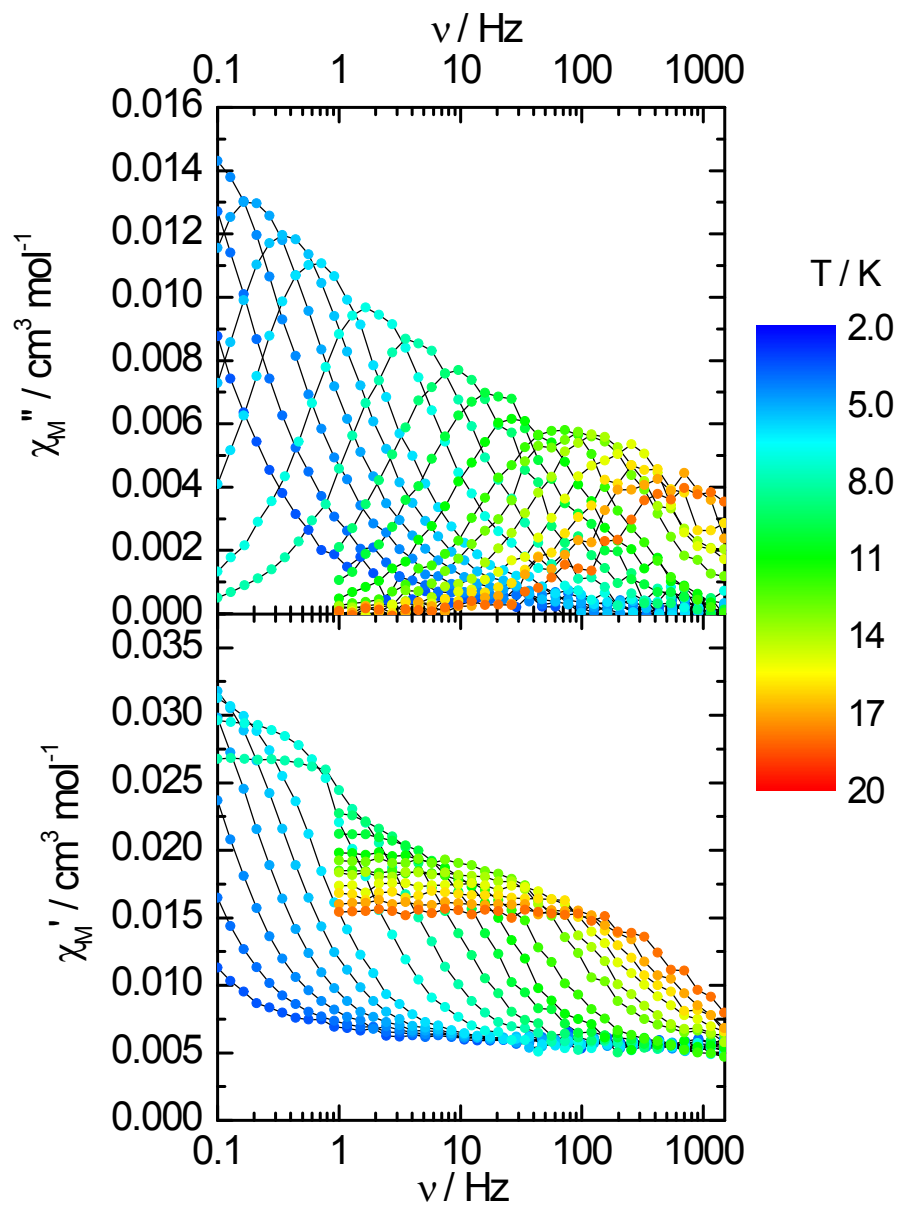

**Figure S18.** Frequency dependences of the in-phase,  $\chi_M'$  (bottom), and out-of-phase,  $\chi_M''$  (top), components of the ac susceptibility between 3.5 and 18 K for  $\text{Dy}_{0.02}\text{Y}_{0.98}(\mathbf{m})$  measured at 1 kOe.

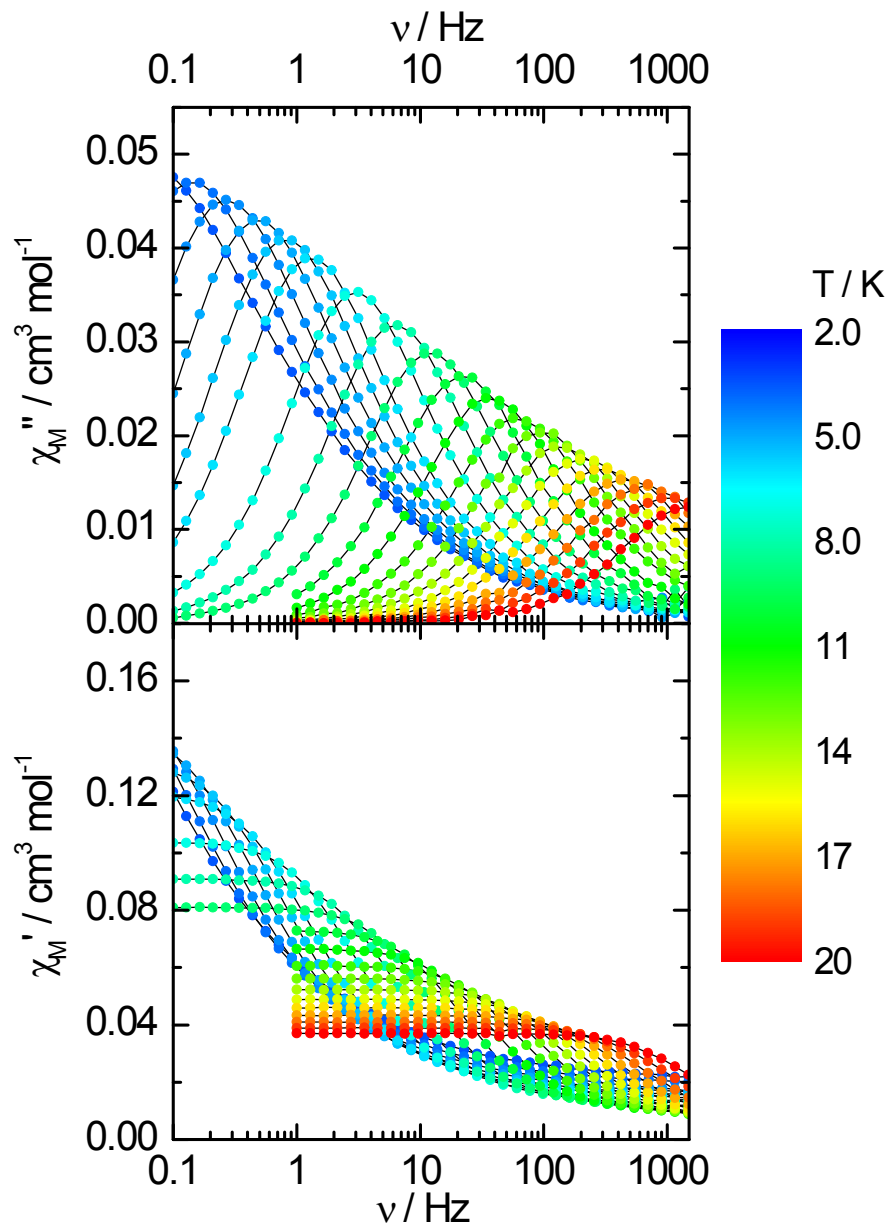

**Figure S19.** Frequency dependences of the in-phase,  $\chi_M'$  (bottom), and out-of-phase,  $\chi_M''$  (top), components of the ac susceptibility between 3.5 and 20 K for  $^{164}\text{Dy}_{0.07}\text{Y}_{0.93}(\mathbf{m})$  measured at zero external dc field.

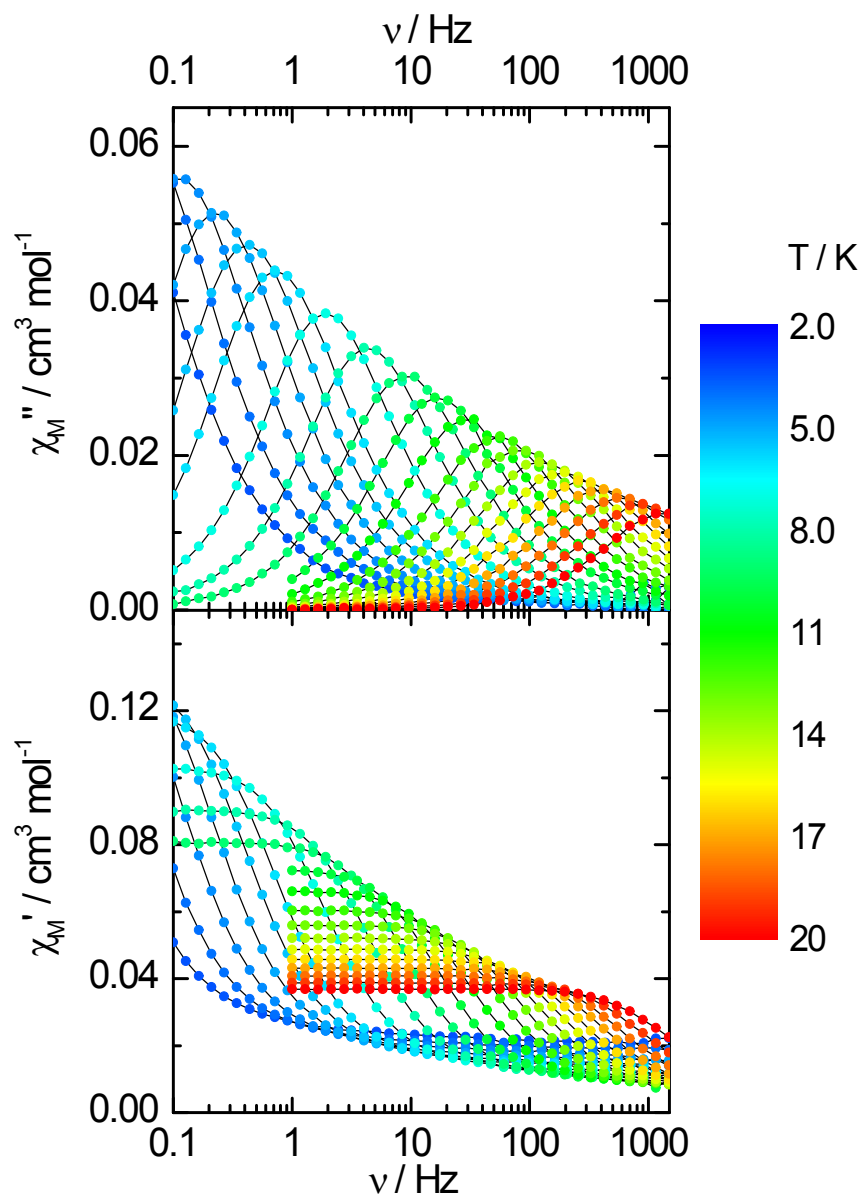

**Figure S20.** Frequency dependences of the in-phase,  $\chi_M'$  (bottom), and out-of-phase,  $\chi_M''$  (top), components of the ac susceptibility between 3.5 and 20 K for  $^{164}\text{Dy}_{0.07}\text{Y}_{0.93}(\mathbf{m})$  measured at 1 kOe.

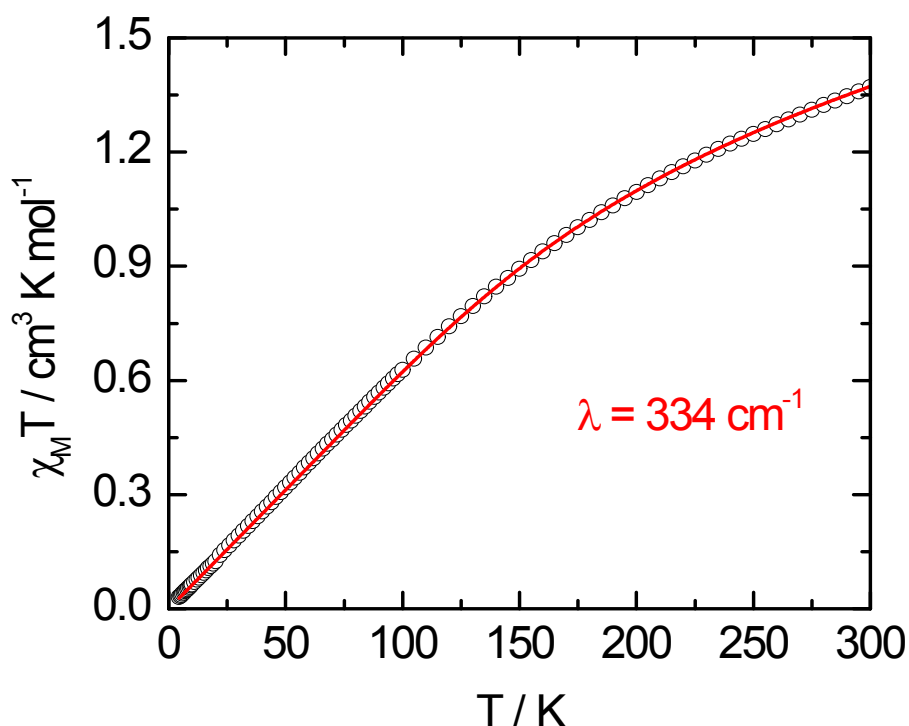

**Figure S21.** Temperature variation of  $\chi_M T$  for **Eu(t)** with the best-fitted curve (see here below).

Magnetism of Eu<sup>III</sup> complexes:

The spin-orbit coupling operator is:

$$\hat{H} = \lambda \hat{L} \cdot \hat{S} \text{ where } \lambda \text{ is the spin-orbit coupling parameter.}$$

The energies of  $\mathbf{J} = \mathbf{L} + \mathbf{S}$  states are:

$$E(J) = \lambda J(J+1)/2 \text{ where the energy of } {}^7F_0 \text{ state has been taken as the origin.}$$

The magnetic susceptibility considering that excited states ( ${}^7F_J$  with  $J = 1$  to  $5$ ) can be thermally populated is expressed as

$$\chi_M = \frac{\sum_{J=0}^6 (2J+1) \chi_M(J) \exp\left[\frac{-\lambda J(J+1)}{2kT}\right]}{\sum_{J=0}^6 (2J+1) \exp\left[\frac{-\lambda J(J+1)}{2kT}\right]}$$

$$\text{With } \chi_M(J) = \frac{Ng_J^2 \beta^2 J(J+1)}{3kT} + \frac{2N\beta^2 (g_J - 1)(g_J - 2)}{3\lambda}$$

$g_J$  has its common meaning. The first term is the Curie law and the second term is the temperature Independent Paramagnetism (TIP) which is due to the field induced mixing with close excited states. In this frame  $\chi_M$  can be rewritten:

$$\chi_M = \frac{N\beta^2}{3kTx} \frac{\left[ \begin{aligned} &24 + \left(\frac{27x}{2} - \frac{3}{2}\right)e^{-x} + \left(\frac{135x}{2} - \frac{5}{2}\right)e^{-3x} \\ &+ \left(189x - \frac{7}{2}\right)e^{-6x} + \left(405x - \frac{9}{2}\right)e^{-10x} \\ &+ \left(\frac{1485x}{2} - \frac{11}{2}\right)e^{-15x} + \left(\frac{2457x}{2} - \frac{13}{2}\right)e^{-21x} \end{aligned} \right]}{1 + 3e^{-x} + 5e^{-3x} + 7e^{-6x} + 9e^{-10x} + 11e^{-15x} + 13e^{-21x}}$$

With  $x = \frac{\lambda}{kT}$

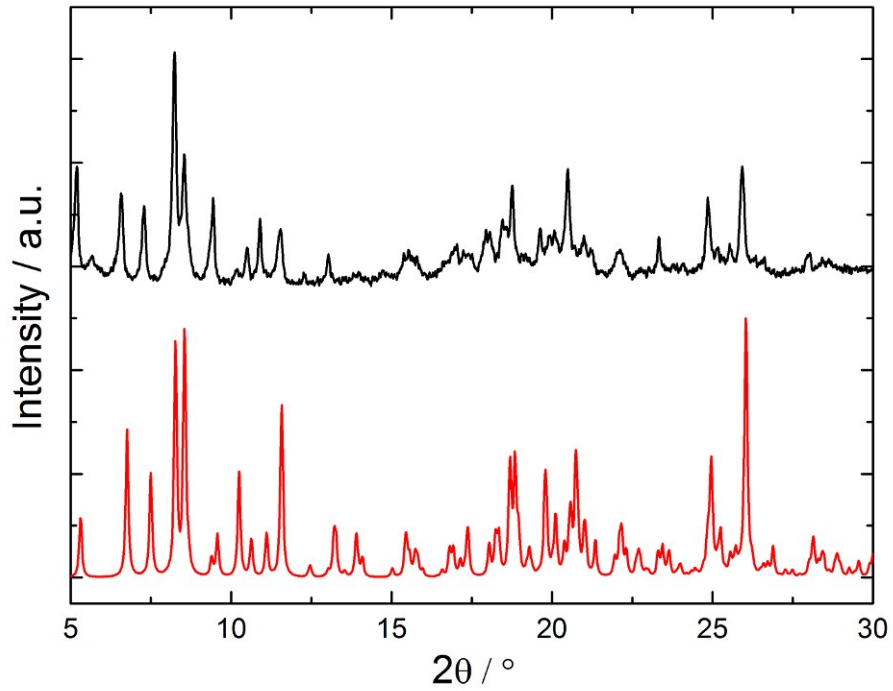

**Figure S22.** Superposition of experimental X-ray powder diffraction patterns from  $^{164}\text{Dy}_{0.05}\text{Eu}_{0.95}(\mathbf{t})$  (black) measured at 300 K and simulated from  $\text{Eu}(\mathbf{t})$  single-crystal data obtained at 150 K (red).

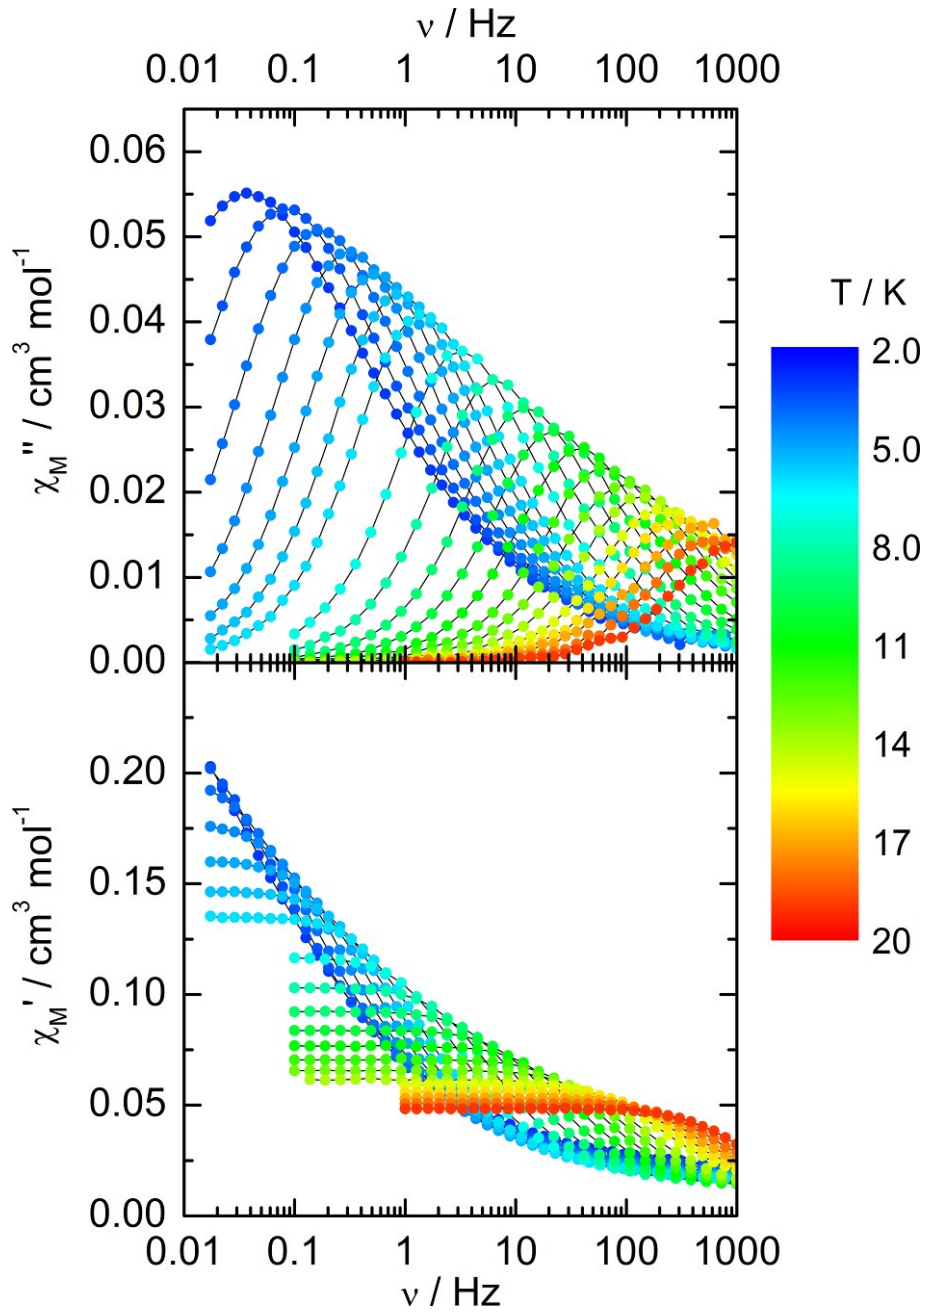

**Figure S23.** Frequency dependences of the in-phase,  $\chi_M'$  (bottom), and out-of-phase,  $\chi_M''$  (top), components of the ac susceptibility between 3 and 19 K for  $^{164}\text{Dy}_{0.05}\text{Eu}_{0.95}(\text{t})$  measured at zero external dc field.

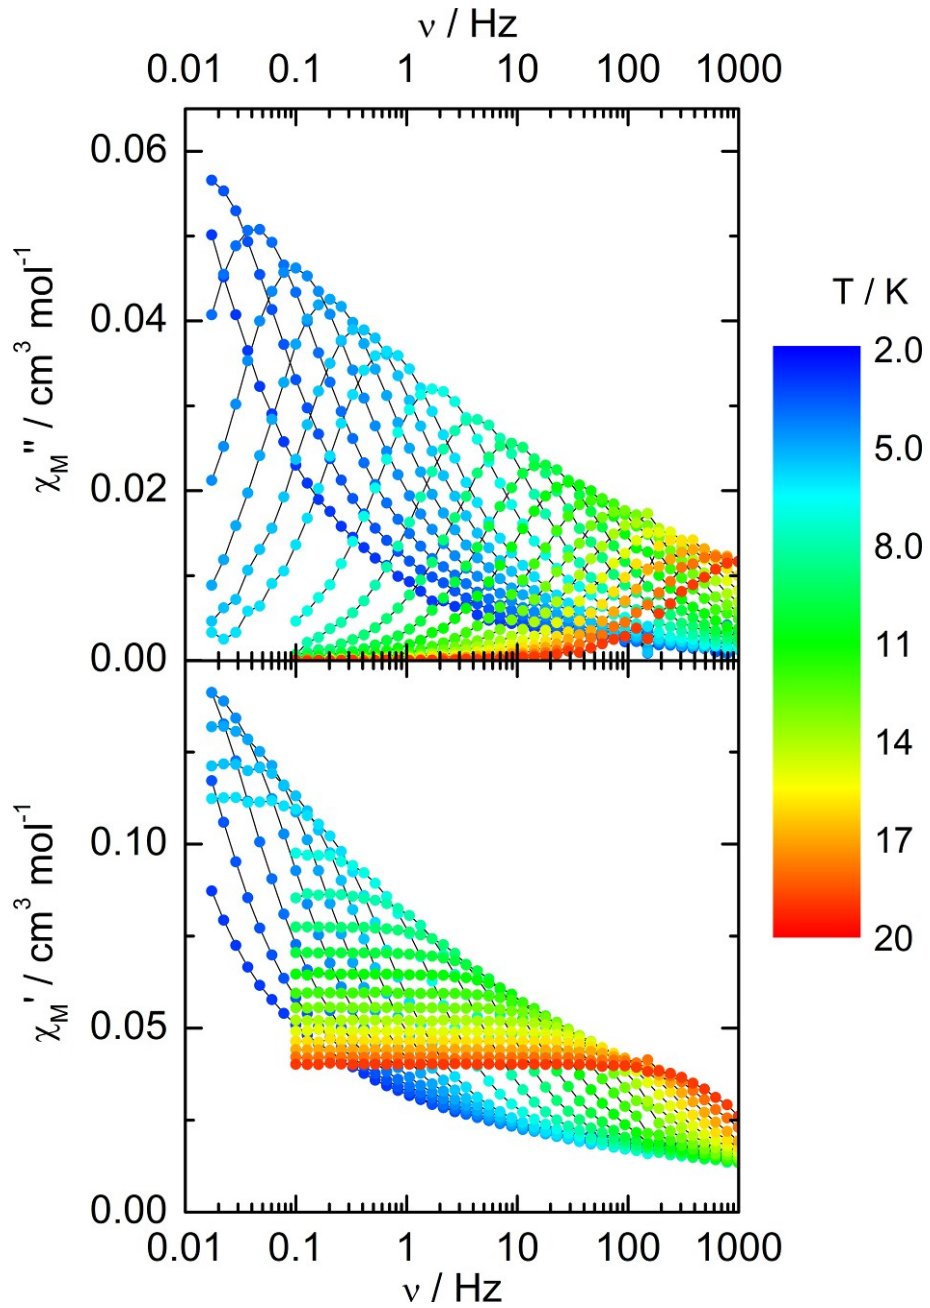

**Figure S24.** Frequency dependences of the in-phase,  $\chi_M'$  (bottom), and out-of-phase,  $\chi_M''$  (top), components of the ac susceptibility between 3 and 19 K for  $^{164}\text{Dy}_{0.05}\text{Eu}_{0.95}(\text{t})$  measured at 1 kOe.

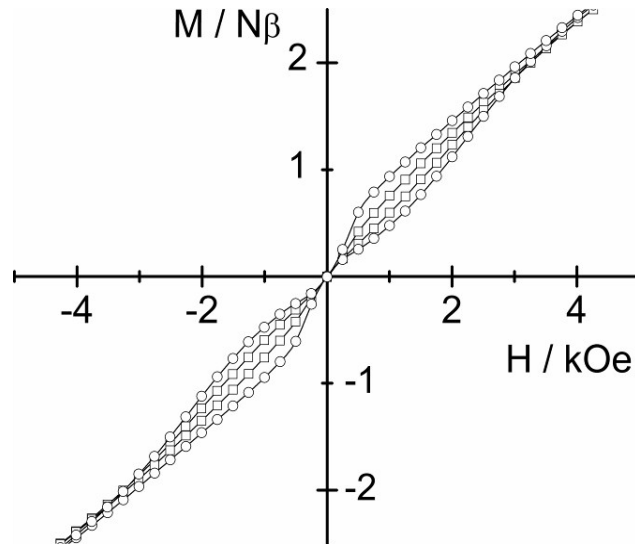

**Figure S25.** Magnetic hysteresis curves for  $\text{Dy}(\text{t})$  (white circles) and  $\text{Dy}(\text{m})$  (white squares) recorded at 3 K at a sweep rate of  $16 \text{ Oe s}^{-1}$ .

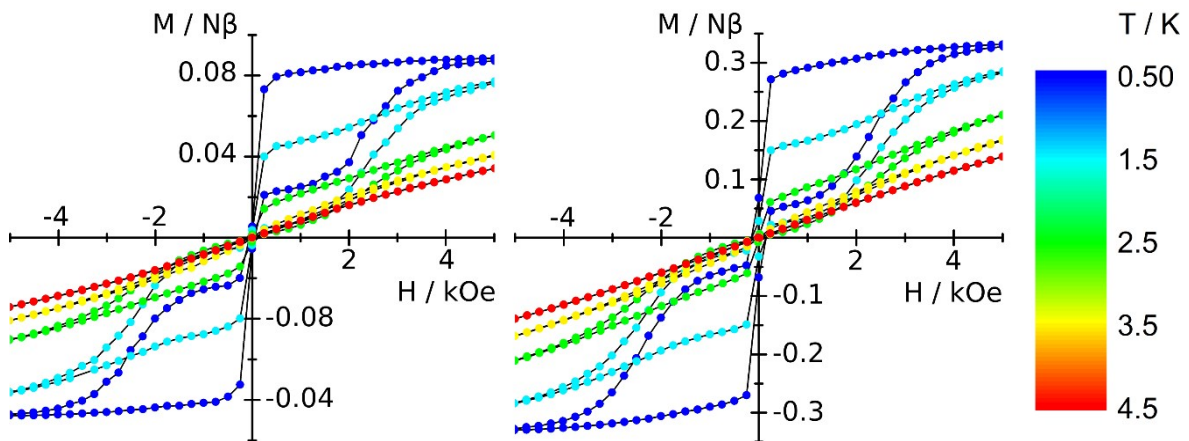

**Figure S26.** Hysteresis loops for  $\text{Dy}_{0.02}\text{Y}_{0.98}(\text{m})$  (left) and  $^{164}\text{Dy}_{0.07}\text{Y}_{0.93}(\text{m})$  (right) at various temperatures between 500 mK and 4.5 K at a sweep rate of  $16 \text{ Oe s}^{-1}$  (lines are eye guides only).

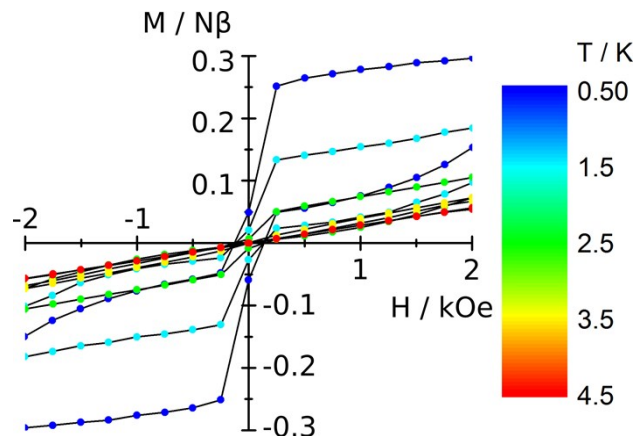

**Figure S27.** Hysteresis loops for  $^{164}\text{Dy}_{0.05}\text{Eu}_{0.95}(\text{t})$  at various temperatures between 500 mK and 4.5 K at a sweep rate of  $16 \text{ Oe s}^{-1}$  (lines are eye guides only).



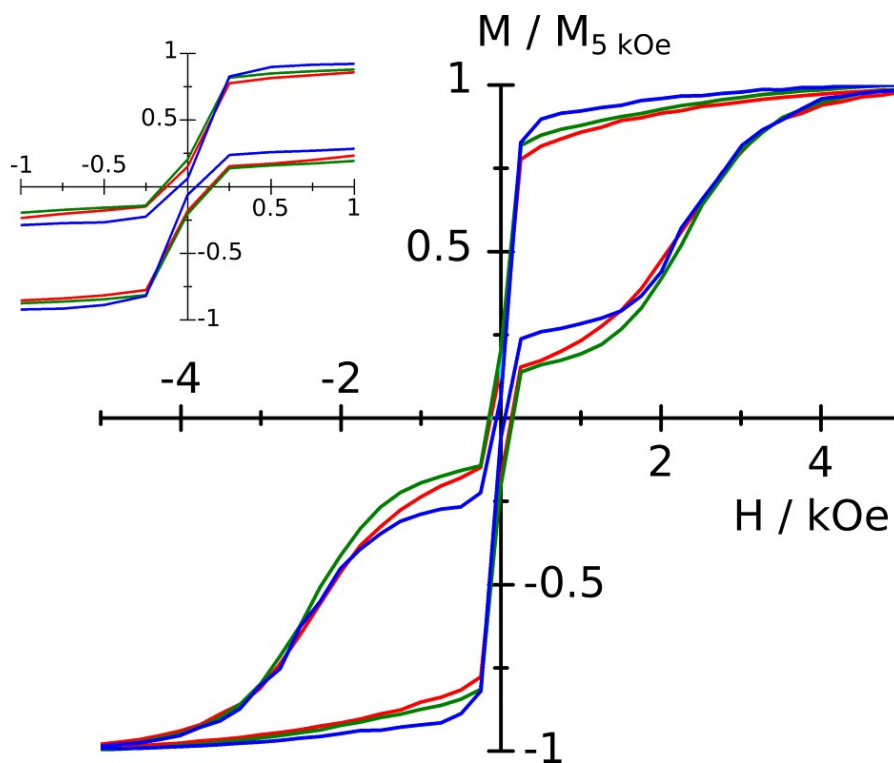

**Figure S28.** Hysteresis loops for  $^{164}\text{Dy}_{0.05}\text{Eu}_{0.95}(\mathbf{t})$  (red),  $\text{Dy}_{0.02}\text{Y}_{0.98}(\mathbf{m})$  (blue) and  $^{164}\text{Dy}_{0.07}\text{Y}_{0.93}(\mathbf{m})$  (olive) at 500 mK and at a sweep rate of  $16 \text{ Oe s}^{-1}$ . The inset is a zoom on the origin.

**Table S1.** X-ray crystallographic data for the complexes.

| Compounds                              | [Eu(tta) <sub>3</sub> (L)]·CH <sub>2</sub> Cl <sub>2</sub><br><b>Eu(t)</b>                                          | [Dy(tta) <sub>3</sub> (L)]·CH <sub>2</sub> Cl <sub>2</sub><br><b>Dy(t)</b>                                           | [Dy(tta) <sub>3</sub> (L)]<br><b>Dy(m)</b>                                                     |
|----------------------------------------|---------------------------------------------------------------------------------------------------------------------|----------------------------------------------------------------------------------------------------------------------|------------------------------------------------------------------------------------------------|
| Formula                                | C <sub>45</sub> H <sub>28</sub> Cl <sub>2</sub> EuF <sub>9</sub> N <sub>2</sub> O <sub>6</sub> S <sub>10</sub>      | C <sub>45</sub> H <sub>28</sub> Cl <sub>2</sub> DyF <sub>9</sub> N <sub>2</sub> O <sub>6</sub> S <sub>10</sub>       | C <sub>44</sub> H <sub>26</sub> DyF <sub>9</sub> N <sub>2</sub> O <sub>6</sub> S <sub>10</sub> |
| M / g.mol <sup>-1</sup>                | 1407.15                                                                                                             | 1417.69                                                                                                              | 1332.80                                                                                        |
| Crystal system                         | Triclinic                                                                                                           | Triclinic                                                                                                            | Monoclinic                                                                                     |
| Space group                            | P-1 (N°2)                                                                                                           | P-1 (N°2)                                                                                                            | P2 <sub>1</sub> /a                                                                             |
| Cell parameters                        | a = 11.7393(7) Å<br>b = 14.6701(9) Å<br>c = 17.5396(9) Å<br>α = 98.076(3) °<br>β = 101.888(3) °<br>γ = 113.182(2) ° | a = 11.8296(17) Å<br>b = 14.6040(3) Å<br>c = 17.5490(3) Å<br>α = 97.487(8) °<br>β = 102.277(7) °<br>γ = 113.599(7) ° | a = 11.9987(32) Å<br>b = 26.1502(60) Å<br>c = 18.4103(44) Å<br>β = 92.8746(98) °               |
| Volume / Å <sup>3</sup>                | 2633.4(3)                                                                                                           | 2634.8(7)                                                                                                            | 5769.3(35)                                                                                     |
| Z                                      | 2                                                                                                                   | 2                                                                                                                    | 4                                                                                              |
| T / K                                  | 150 (2)                                                                                                             | 150(2)                                                                                                               | 150(2)                                                                                         |
| 2θ range / °                           | 2.44 ≤ 2θ ≤ 55.22                                                                                                   | 5.88 ≤ 2θ ≤ 54.96                                                                                                    | 2.22 ≤ 2θ ≤ 54.96                                                                              |
| ρ <sub>calc</sub> / g.cm <sup>-3</sup> | 1.775                                                                                                               | 1.787                                                                                                                | 1.539                                                                                          |
| μ / mm <sup>-1</sup>                   | 1.770                                                                                                               | 1.997                                                                                                                | 1.729                                                                                          |
| Number of reflections                  | 25495                                                                                                               | 30023                                                                                                                | 33108                                                                                          |
| Independent reflections                | 11896                                                                                                               | 12004                                                                                                                | 13110                                                                                          |
| R <sub>int</sub>                       | 0.0785                                                                                                              | 0.0448                                                                                                               | 0.1469                                                                                         |
| Fo <sup>2</sup> > 2σ(Fo) <sup>2</sup>  | 5347                                                                                                                | 8894                                                                                                                 | 3808                                                                                           |
| Number of variables                    | 635                                                                                                                 | 676                                                                                                                  | 616                                                                                            |
| R <sub>1</sub> , wR <sub>2</sub>       | 0.0907, 0.2306                                                                                                      | 0.0621, 0.1666                                                                                                       | 0.0990, 0.2523                                                                                 |
|                                        |                                                                                                                     |                                                                                                                      |                                                                                                |
| Compounds                              | [Y(tta) <sub>3</sub> (L)]<br><b>Y(m)</b>                                                                            |                                                                                                                      |                                                                                                |
| Formula                                | C <sub>44</sub> H <sub>26</sub> YF <sub>9</sub> N <sub>2</sub> O <sub>6</sub> S <sub>10</sub>                       |                                                                                                                      |                                                                                                |
| M / g.mol <sup>-1</sup>                | 1259.18                                                                                                             |                                                                                                                      |                                                                                                |
| Crystal system                         | Monoclinic                                                                                                          |                                                                                                                      |                                                                                                |
| Space group                            | P2 <sub>1</sub> /a                                                                                                  |                                                                                                                      |                                                                                                |
| Cell parameters                        | a = 11.819(9) Å<br>b = 26.130(20) Å<br>c = 18.549(17) Å<br>β = 93.280(30) °                                         |                                                                                                                      |                                                                                                |
| Volume / Å <sup>3</sup>                | 5719.0(90)                                                                                                          |                                                                                                                      |                                                                                                |
| Z                                      | 4                                                                                                                   |                                                                                                                      |                                                                                                |
| T / K                                  | 150(2)                                                                                                              |                                                                                                                      |                                                                                                |
| 2θ range / °                           | 2.20 ≤ 2θ ≤ 55.46                                                                                                   |                                                                                                                      |                                                                                                |
| ρ <sub>calc</sub> / g.cm <sup>-3</sup> | 1.463                                                                                                               |                                                                                                                      |                                                                                                |
| μ / mm <sup>-1</sup>                   | 1.458                                                                                                               |                                                                                                                      |                                                                                                |
| Number of reflections                  | 36978                                                                                                               |                                                                                                                      |                                                                                                |
| Independent reflections                | 12838                                                                                                               |                                                                                                                      |                                                                                                |
| R <sub>int</sub>                       | 0.1406                                                                                                              |                                                                                                                      |                                                                                                |
| Fo <sup>2</sup> > 2σ(Fo) <sup>2</sup>  | 3881                                                                                                                |                                                                                                                      |                                                                                                |
| Number of variables                    | 620                                                                                                                 |                                                                                                                      |                                                                                                |
| R <sub>1</sub> , wR <sub>2</sub>       | 0.0938, 0.2395                                                                                                      |                                                                                                                      |                                                                                                |

**Table S2.** Selected bond lengths and angles for **Dy(t)** and **Dy(m)**.

|       | <b>Dy(t)</b> | <b>Dy(m)</b> |
|-------|--------------|--------------|
| Dy-N1 | 2.575(5)     | 2.557(11)    |
| Dy-N2 | 2.591(5)     | 2.631(12)    |
| Dy-O1 | 2.339(5)     | 2.295(9)     |
| Dy-O2 | 2.350(5)     | 2.341(9)     |
| Dy-O3 | 2.304(5)     | 2.327(9)     |
| Dy-O4 | 2.286(5)     | 2.316(9)     |
| Dy-O5 | 2.348(5)     | 2.344(10)    |
| Dy-O6 | 2.336(4)     | 2.330(10)    |

**Table S3.** SHAPE analysis of the coordination polyhedron around the lanthanide ions in complexes **Dy(t)** and **Dy(m)**.

| Compound     | CShM <sub>SAPR-8</sub><br>(square antiprism)<br>D <sub>4d</sub> | CShM <sub>BTPR-8</sub><br>(biaugmented<br>trigonal<br>prism)<br>C <sub>2v</sub> | CShM <sub>TDD-8</sub><br>(triangular<br>dodecahedron)<br>D <sub>2d</sub> |
|--------------|-----------------------------------------------------------------|---------------------------------------------------------------------------------|--------------------------------------------------------------------------|
| <b>Dy(t)</b> | 1.140                                                           | 1.963                                                                           | 1.173                                                                    |
| <b>Dy(m)</b> | 0.808                                                           | 2.193                                                                           | 2.531                                                                    |

**Table S4.** Oxidation potentials (V vs SCE, 0.1 M nBu<sub>4</sub>NPF<sub>6</sub>, in CH<sub>2</sub>Cl<sub>2</sub> at 100 mV.s<sup>-1</sup>) of the ligand **L** and related complexes.

|              | E <sup>1</sup> <sub>1/2</sub> | E <sup>2</sup> <sub>1/2</sub> |
|--------------|-------------------------------|-------------------------------|
| <b>L</b>     | 0.507                         | 0.898                         |
| <b>Eu(t)</b> | 0.522                         | 0.911                         |
| <b>Dy(m)</b> | 0.522                         | 0.916                         |
| <b>Y(m)</b>  | 0.525                         | 0.928                         |

**Table S5.** Computed energies levels (the ground state is set at zero), component values of the Lande factor  $g$  and wavefunction composition for each  $M_J$  state of the ground-state multiplet for **Dy(t)** and **Dy(m)**.

|   | Energy (K) | $g_x$ | $g_y$ | $g_z$ | Wavefunction composition                                                                                                      |
|---|------------|-------|-------|-------|-------------------------------------------------------------------------------------------------------------------------------|
|   |            |       |       |       | <b>Dy(t)</b>                                                                                                                  |
| 1 | 0.0        | 0.00  | 0.00  | 19.56 | 0.94 $ \pm 15/2\rangle$                                                                                                       |
| 2 | 225.9      | 0.10  | 0.11  | 16.31 | 0.81 $ \pm 13/2\rangle$ + 0.16 $ \pm 9/2\rangle$                                                                              |
| 3 | 362.0      | 0.86  | 0.92  | 12.80 | 0.56 $ \pm 11/2\rangle$ + 0.27 $ \pm 7/2\rangle$                                                                              |
| 4 | 447.2      | 3.27  | 4.18  | 8.92  | 0.38 $ \pm 5/2\rangle$ + 0.27 $ \pm 9/2\rangle$ + 0.10 $ \pm 3/2\rangle$                                                      |
| 5 | 492.8      | 0.60  | 4.57  | 10.83 | 0.29 $ \pm 3/2\rangle$ + 0.29 $ \pm 1/2\rangle$ + 0.14 $ \pm 9/2\rangle$                                                      |
| 6 | 541.6      | 2.72  | 4.11  | 12.37 | 0.30 $ \pm 5/2\rangle$ + 0.23 $ \pm 3/2\rangle$ + 0.21 $ \pm 7/2\rangle$<br>+ 0.15 $ \pm 1/2\rangle$                          |
| 7 | 599.4      | 0.62  | 1.85  | 17.69 | 0.45 $ \pm 1/2\rangle$ + 0.31 $ \pm 3/2\rangle$ + 0.15 $ \pm 5/2\rangle$                                                      |
| 8 | 787.0      | 0.01  | 0.02  | 19.71 | 0.28 $ \pm 9/2\rangle$ + 0.23 $ \pm 7/2\rangle$ + 0.21 $ \pm 11/2\rangle$<br>+ 0.13 $ \pm 5/2\rangle$                         |
|   |            |       |       |       | <b>Dy(t)</b>                                                                                                                  |
| 1 | 0.0        | 0.01  | 0.02  | 19.44 | 0.93 $ \pm 15/2\rangle$                                                                                                       |
| 2 | 197.0      | 0.25  | 0.47  | 15.38 | 0.70 $ \pm 13/2\rangle$ + 0.22 $ \pm 9/2\rangle$                                                                              |
| 3 | 297.5      | 0.36  | 0.72  | 12.04 | 0.49 $ \pm 11/2\rangle$ + 0.32 $ \pm 7/2\rangle$                                                                              |
| 4 | 380.1      | 2.14  | 3.75  | 9.25  | 0.35 $ \pm 5/2\rangle$ + 0.21 $ \pm 9/2\rangle$ + 0.14 $ \pm 13/2\rangle$                                                     |
| 5 | 437.3      | 0.29  | 3.98  | 9.14  | 0.36 $ \pm 3/2\rangle$ + 0.26 $ \pm 1/2\rangle$ + 0.11 $ \pm 7/2\rangle$<br>+ 0.10 $ \pm 11/2\rangle$                         |
| 6 | 493.5      | 2.26  | 5.35  | 13.02 | 0.25 $ \pm 5/2\rangle$ + 0.22 $ \pm 7/2\rangle$ + 0.16 $ \pm 3/2\rangle$<br>+ 0.16 $ \pm 1/2\rangle$ + 0.14 $ \pm 9/2\rangle$ |
| 7 | 607.5      | 0.22  | 0.56  | 19.11 | 0.39 $ \pm 1/2\rangle$ + 0.31 $ \pm 3/2\rangle$ + 0.18 $ \pm 5/2\rangle$                                                      |
| 8 | 718.0      | 0.02  | 0.04  | 19.71 | 0.27 $ \pm 9/2\rangle$ + 0.25 $ \pm 11/2\rangle$ + 0.19 $ \pm 7/2\rangle$<br>+ 0.10 $ \pm 5/2\rangle$                         |

**Table S6.** Best fitted parameters ( $\chi_T$ ,  $\chi_S$ ,  $\tau$  and  $\alpha$ ) with the extended Debye model for  $Dy(t)$  at 0 Oe in the temperature range 2-18 K.

| T / K | $\chi_T / \text{cm}^3 \text{mol}^{-1}$ | $\chi_S / \text{cm}^3 \text{mol}^{-1}$ | $\alpha$ | $\tau / \text{s}$ | $R^2$   |
|-------|----------------------------------------|----------------------------------------|----------|-------------------|---------|
| 2     | 5.85625                                | 0.2167                                 | 0.22926  | 0.00508           | 0.99926 |
| 2.2   | 5.39416                                | 0.19371                                | 0.23097  | 0.00506           | 0.99924 |
| 2.4   | 4.91494                                | 0.18364                                | 0.23087  | 0.00505           | 0.99923 |
| 2.6   | 4.53815                                | 0.16434                                | 0.23205  | 0.00502           | 0.99923 |
| 2.8   | 4.21537                                | 0.16087                                | 0.23136  | 0.005             | 0.99923 |
| 3     | 3.94029                                | 0.1533                                 | 0.2315   | 0.00498           | 0.99924 |
| 3.5   | 3.38495                                | 0.13246                                | 0.23325  | 0.00487           | 0.99919 |
| 4     | 2.96838                                | 0.11983                                | 0.2325   | 0.00476           | 0.99922 |
| 4.5   | 2.65023                                | 0.10615                                | 0.23206  | 0.00461           | 0.99902 |
| 5     | 2.38113                                | 0.10798                                | 0.22906  | 0.00451           | 0.99915 |
| 5.5   | 2.16771                                | 0.09911                                | 0.22775  | 0.00431           | 0.9991  |
| 6     | 1.98795                                | 0.09973                                | 0.22329  | 0.00411           | 0.99909 |
| 7     | 1.70411                                | 0.09693                                | 0.21052  | 0.0036            | 0.99907 |
| 8     | 1.48964                                | 0.09091                                | 0.19521  | 0.00299           | 0.99907 |
| 9     | 1.31984                                | 0.08829                                | 0.17564  | 0.0024            | 0.99912 |
| 10    | 1.18604                                | 0.08457                                | 0.15626  | 0.00189           | 0.99925 |
| 11    | 1.07636                                | 0.0795                                 | 0.13916  | 0.00145           | 0.99942 |
| 12    | 0.97882                                | 0.07578                                | 0.1226   | 0.00108           | 0.99958 |
| 13    | 0.9055                                 | 0.07048                                | 0.11423  | 8.22E-04          | 0.99967 |
| 14    | 0.84251                                | 0.068                                  | 0.1046   | 6.27E-04          | 0.99972 |
| 15    | 0.7872                                 | 0.06348                                | 0.09922  | 4.75E-04          | 0.99979 |
| 16    | 0.7382                                 | 0.06499                                | 0.09198  | 3.60E-04          | 0.99984 |
| 17    | 0.69518                                | 0.06753                                | 0.08461  | 2.72E-04          | 0.99986 |
| 18    | 0.6578                                 | 0.0716                                 | 0.08069  | 2.00E-04          | 0.9999  |

**Table S7.** Best fitted parameters ( $\chi_T$ ,  $\chi_S$ ,  $\tau$  and  $\alpha$ ) with the extended Debye model for **Dy(m)** at 0 Oe in the temperature range 2-19 K.

| T / K | $\chi_T / \text{cm}^3 \text{mol}^{-1}$ | $\chi_S / \text{cm}^3 \text{mol}^{-1}$ | $\alpha$ | $\tau / \text{s}$ | $R^2$   |
|-------|----------------------------------------|----------------------------------------|----------|-------------------|---------|
| 2     | 5.58038                                | 0.27172                                | 0.33481  | 0.00203           | 0.99932 |
| 2.2   | 5.1363                                 | 0.27543                                | 0.33185  | 0.00204           | 0.99937 |
| 2.4   | 4.68683                                | 0.25329                                | 0.33293  | 0.00203           | 0.99932 |
| 2.6   | 4.32422                                | 0.23724                                | 0.33104  | 0.00201           | 0.99936 |
| 2.8   | 4.0191                                 | 0.21747                                | 0.33138  | 0.00199           | 0.99936 |
| 3     | 3.75784                                | 0.20786                                | 0.33224  | 0.00199           | 0.99932 |
| 3.5   | 3.22697                                | 0.1916                                 | 0.32965  | 0.00192           | 0.9994  |
| 4     | 2.82954                                | 0.18007                                | 0.32654  | 0.00189           | 0.99936 |
| 4.5   | 2.52809                                | 0.12877                                | 0.33055  | 0.00176           | 0.99913 |
| 5     | 2.26717                                | 0.16119                                | 0.31616  | 0.00177           | 0.99938 |
| 5.5   | 2.06294                                | 0.14655                                | 0.31072  | 0.00166           | 0.99934 |
| 6     | 1.8925                                 | 0.13736                                | 0.3054   | 0.00155           | 0.99934 |
| 7     | 1.6209                                 | 0.12719                                | 0.2878   | 0.0013            | 0.99939 |
| 8     | 1.41875                                | 0.10699                                | 0.28001  | 0.00101           | 0.99947 |
| 9     | 1.25773                                | 0.09092                                | 0.27192  | 7.54E-04          | 0.99954 |
| 10    | 1.1332                                 | 0.07388                                | 0.27256  | 5.40E-04          | 0.99949 |
| 11    | 1.03056                                | 0.07069                                | 0.27624  | 3.94E-04          | 0.99951 |
| 12    | 0.93875                                | 0.08202                                | 0.27225  | 2.86E-04          | 0.99939 |
| 13    | 0.87085                                | 0.09869                                | 0.27292  | 2.23E-04          | 0.99942 |
| 14    | 0.80867                                | 0.12581                                | 0.26068  | 1.80E-04          | 0.99951 |

**Table S8.** Best fitted parameters ( $\chi_T$ ,  $\chi_S$ ,  $\tau$  and  $\alpha$ ) with the extended Debye model for **Dy(t)** at 1 kOe in the temperature range 7-18 K.

| T / K | $\chi_T / \text{cm}^3 \text{mol}^{-1}$ | $\chi_S / \text{cm}^3 \text{mol}^{-1}$ | $\alpha$ | $\tau / \text{s}$ | $R^2$   |
|-------|----------------------------------------|----------------------------------------|----------|-------------------|---------|
| 7     | 1.66312                                | 0.04905                                | 0.12408  | 0.0864            | 0.99985 |
| 8     | 1.44001                                | 0.04616                                | 0.10512  | 0.03678           | 0.99991 |
| 9     | 1.27179                                | 0.04493                                | 0.09305  | 0.01738           | 0.99986 |
| 10    | 1.14282                                | 0.04289                                | 0.0877   | 0.00904           | 0.99984 |
| 11    | 1.03787                                | 0.04099                                | 0.08354  | 0.00505           | 0.99989 |
| 12    | 0.94543                                | 0.03786                                | 0.08487  | 0.00285           | 0.99987 |
| 13    | 0.87554                                | 0.0389                                 | 0.08319  | 0.0018            | 0.99986 |
| 14    | 0.81492                                | 0.03837                                | 0.08523  | 0.00118           | 0.99987 |
| 15    | 0.76198                                | 0.03873                                | 0.08413  | 7.88E-04          | 0.99986 |
| 16    | 0.71491                                | 0.04192                                | 0.0818   | 5.40E-04          | 0.99987 |
| 17    | 0.6765                                 | 0.04384                                | 0.08112  | 3.71E-04          | 0.99988 |
| 18    | 0.63916                                | 0.04922                                | 0.07158  | 2.54E-04          | 0.9999  |

**Table S9.** Best fitted parameters ( $\chi_T$ ,  $\chi_S$ ,  $\tau$  and  $\alpha$ ) with the extended Debye model for **Dy(m)** at 1 kOe in the temperature range 4.5-16 K.

| T / K | $\chi_T / \text{cm}^3 \text{mol}^{-1}$ | $\chi_S / \text{cm}^3 \text{mol}^{-1}$ | $\alpha$ | $\tau / \text{s}$ | $R^2$   |
|-------|----------------------------------------|----------------------------------------|----------|-------------------|---------|
| 4.5   | 2.09766                                | 0.08872                                | 0.26459  | 0.11826           | 0.9995  |
| 5     | 1.95422                                | 0.07624                                | 0.27009  | 0.07146           | 0.99943 |
| 5.5   | 1.83319                                | 0.06441                                | 0.27733  | 0.04548           | 0.99914 |
| 6     | 1.75006                                | 0.0527                                 | 0.29418  | 0.03083           | 0.99868 |
| 7     | 1.59575                                | 0.03104                                | 0.31945  | 0.0149            | 0.99835 |
| 8     | 1.42924                                | 0.01481                                | 0.32742  | 0.00715           | 0.99879 |
| 9     | 1.276                                  | 0.00522                                | 0.3286   | 0.00352           | 0.99911 |
| 10    | 1.14844                                | 0.00209                                | 0.32525  | 0.00189           | 0.99911 |
| 11    | 1.04451                                | 3.19E-14                               | 0.32953  | 1.04E-03          | 0.99906 |
| 12    | 0.94868                                | 0.00606                                | 0.32508  | 5.83E-04          | 0.99904 |
| 13    | 0.8757                                 | 0.03021                                | 0.31754  | 3.87E-04          | 0.99909 |
| 14    | 0.81372                                | 0.05865                                | 0.30507  | 2.71E-04          | 0.99917 |
| 15    | 0.75907                                | 0.10724                                | 0.28035  | 2.12E-04          | 0.9993  |
| 16    | 0.70758                                | 0.14747                                | 0.24995  | 1.69E-04          | 0.99957 |

**Table S10.** Best fitted parameters ( $\chi_T$ ,  $\chi_S$ ,  $\tau$  and  $\alpha$ ) with the extended Debye model for  $^{164}\text{Dy}(\text{m})$  at 0 kOe in the temperature range 2-12 K.

| T / K | $\chi_T / \text{cm}^3 \text{mol}^{-1}$ | $\chi_S / \text{cm}^3 \text{mol}^{-1}$ | $\alpha$ | $\tau / \text{s}$ | $R^2$   |
|-------|----------------------------------------|----------------------------------------|----------|-------------------|---------|
| 2     | 5.46402                                | 0.70549                                | 0.31546  | 0.00338           | 0.99946 |
| 2.2   | 4.99459                                | 0.67833                                | 0.31488  | 0.00336           | 0.99951 |
| 2.4   | 4.58024                                | 0.63869                                | 0.31522  | 0.00333           | 0.99952 |
| 2.6   | 4.24113                                | 0.60994                                | 0.31494  | 0.00329           | 0.99953 |
| 2.8   | 3.95138                                | 0.58136                                | 0.31476  | 0.00325           | 0.99953 |
| 3     | 3.70203                                | 0.55412                                | 0.31574  | 0.0032            | 0.99953 |
| 3.5   | 3.19235                                | 0.5015                                 | 0.31266  | 0.00306           | 0.99951 |
| 4     | 2.80958                                | 0.46012                                | 0.30681  | 0.00292           | 0.99947 |
| 4.5   | 2.50325                                | 0.42637                                | 0.29748  | 0.00274           | 0.9994  |
| 5     | 2.25883                                | 0.40293                                | 0.28278  | 0.00253           | 0.99936 |
| 5.5   | 2.05294                                | 0.3825                                 | 0.26229  | 0.00229           | 0.99937 |
| 6     | 1.8813                                 | 0.36294                                | 0.24324  | 0.00203           | 0.99937 |
| 7     | 1.61075                                | 0.32376                                | 0.20896  | 0.00149           | 0.99955 |
| 8     | 1.40942                                | 0.28582                                | 0.18644  | 0.00103           | 0.99974 |
| 9     | 1.25223                                | 0.25144                                | 0.1742   | 6.93E-04          | 0.99986 |
| 10    | 1.12963                                | 0.22124                                | 0.17335  | 4.57E-04          | 0.99987 |
| 11    | 1.02789                                | 0.20084                                | 0.1754   | 3.03E-04          | 0.99992 |
| 12    | 0.93889                                | 0.18644                                | 0.17854  | 2.01E-04          | 0.9999  |

**Table S11.** Best fitted parameters ( $\chi_T$ ,  $\chi_S$ ,  $\tau$  and  $\alpha$ ) with the extended Debye model for  $^{164}\text{Dy}(\text{m})$  at 1 kOe in the temperature range 4-13 K.

| T / K | $\chi_T / \text{cm}^3 \text{mol}^{-1}$ | $\chi_S / \text{cm}^3 \text{mol}^{-1}$ | $\alpha$ | $\tau / \text{s}$ | $R^2$   |
|-------|----------------------------------------|----------------------------------------|----------|-------------------|---------|
| 4     | 2.79735                                | 0.35163                                | 0.27142  | 0.18566           | 0.99926 |
| 4.5   | 2.44601                                | 0.32053                                | 0.24806  | 0.09289           | 0.9998  |
| 5     | 2.2024                                 | 0.29306                                | 0.23531  | 0.0519            | 0.99988 |
| 5.5   | 2.00396                                | 0.27072                                | 0.22478  | 0.03078           | 0.99983 |
| 6     | 1.84322                                | 0.24921                                | 0.21912  | 0.01918           | 0.99989 |
| 7     | 1.5903                                 | 0.22253                                | 0.20995  | 0.00831           | 0.99987 |
| 8     | 1.3986                                 | 0.19315                                | 0.2064   | 0.00395           | 0.99993 |
| 9     | 1.2478                                 | 0.17346                                | 0.20611  | 0.00202           | 0.99993 |
| 10    | 1.12721                                | 0.15582                                | 0.21255  | 0.00108           | 0.99987 |
| 11    | 1.02919                                | 0.14236                                | 0.21698  | 6.11E-04          | 0.9999  |
| 12    | 0.93891                                | 0.14103                                | 0.22013  | 3.52E-04          | 0.99989 |
| 13    | 0.87002                                | 0.13971                                | 0.22105  | 2.22E-04          | 0.9999  |



**Table S12.** Best fitted parameters ( $\chi_T$ ,  $\chi_S$ ,  $\tau$  and  $\alpha$ ) with the extended Debye model for  $Dy_{0.02}Y_{0.98}(m)$  at 0 kOe in the temperature range 4-18 K.

| T / K | $\chi_T / \text{cm}^3 \text{mol}^{-1}$ | $\chi_S / \text{cm}^3 \text{mol}^{-1}$ | $\alpha$ | $\tau / \text{s}$ | $R^2$   |
|-------|----------------------------------------|----------------------------------------|----------|-------------------|---------|
| 4     | 0.06373                                | 0.00807                                | 0.44269  | 3.13692           | 0.9973  |
| 4.5   | 0.05129                                | 0.00798                                | 0.37799  | 1.07695           | 0.99342 |
| 5     | 0.04228                                | 0.00836                                | 0.28751  | 0.44029           | 0.99779 |
| 5.5   | 0.03796                                | 0.00836                                | 0.23883  | 0.24168           | 0.99793 |
| 6     | 0.03469                                | 0.00831                                | 0.2054   | 0.14315           | 0.9982  |
| 7     | 0.03035                                | 0.00816                                | 0.17203  | 0.05921           | 0.99868 |
| 8     | 0.02705                                | 0.00801                                | 0.13668  | 0.0274            | 0.99889 |
| 9     | 0.02494                                | 0.00778                                | 0.13039  | 0.01434           | 0.99888 |
| 10    | 0.02309                                | 0.00781                                | 0.12545  | 0.00784           | 0.99854 |
| 11    | 0.02149                                | 0.00776                                | 0.11787  | 4.59E-03          | 0.99886 |
| 12    | 0.02022                                | 0.00747                                | 0.124    | 2.57E-03          | 0.99905 |
| 13    | 0.01921                                | 0.00769                                | 0.10968  | 1.67E-03          | 0.99852 |
| 14    | 0.0183                                 | 0.00762                                | 0.12428  | 1.10E-03          | 0.99896 |
| 15    | 0.01762                                | 0.00762                                | 0.10519  | 7.72E-04          | 0.99937 |
| 16    | 0.01684                                | 0.00719                                | 0.13967  | 5.09E-04          | 0.99906 |
| 17    | 0.01639                                | 0.0077                                 | 0.12092  | 3.69E-04          | 0.9991  |
| 18    | 0.01577                                | 0.00807                                | 0.07833  | 2.74E-04          | 0.9977  |

**Table S13.** Best fitted parameters ( $\chi_T$ ,  $\chi_S$ ,  $\tau$  and  $\alpha$ ) with the extended Debye model for  $Dy_{0.02}Y_{0.98}(m)$  at 1 kOe in the temperature range 4-18 K.

| T / K | $\chi_T / \text{cm}^3 \text{mol}^{-1}$ | $\chi_S / \text{cm}^3 \text{mol}^{-1}$ | $\alpha$ | $\tau / \text{s}$ | $R^2$   |
|-------|----------------------------------------|----------------------------------------|----------|-------------------|---------|
| 4     | 0.05613                                | 0.00581                                | 0.24095  | 5.41686           | 0.99774 |
| 4.5   | 0.0455                                 | 0.00579                                | 0.19991  | 1.88821           | 0.99496 |
| 5     | 0.04016                                | 0.00568                                | 0.17563  | 0.8533            | 0.99916 |
| 5.5   | 0.03612                                | 0.00564                                | 0.15182  | 0.42957           | 0.99932 |
| 6     | 0.03306                                | 0.00567                                | 0.13009  | 0.2365            | 0.9995  |
| 7     | 0.02994                                | 0.00552                                | 0.11125  | 0.08841           | 0.9977  |
| 8     | 0.02686                                | 0.00551                                | 0.11582  | 0.03972           | 0.99826 |
| 9     | 0.02346                                | 0.0054                                 | 0.09781  | 0.01772           | 0.99887 |
| 10    | 0.02161                                | 0.00557                                | 0.08565  | 0.00948           | 0.99905 |
| 11    | 0.01988                                | 0.00548                                | 0.06732  | 0.00537           | 0.99831 |
| 12    | 0.01851                                | 0.0052                                 | 0.06478  | 0.00288           | 0.99877 |
| 13    | 0.0194                                 | 0.00596                                | 0.08312  | 0.00176           | 0.99912 |
| 14    | 0.01841                                | 0.00567                                | 0.10162  | 0.00115           | 0.99902 |

|    |         |         |         |          |         |
|----|---------|---------|---------|----------|---------|
| 15 | 0.01751 | 0.0065  | 0.04979 | 7.97E-04 | 0.99909 |
| 16 | 0.01681 | 0.00624 | 0.08397 | 5.36E-04 | 0.99879 |
| 17 | 0.01611 | 0.0058  | 0.09783 | 3.57E-04 | 0.99878 |
| 18 | 0.01552 | 0.00597 | 0.10169 | 2.28E-04 | 0.99908 |

**Table S14.** Cell parameters for  $^{164}\text{Dy}_{0.07}\text{Y}_{0.93}(\text{m})$ .

|                         |                                                                                                                                          |
|-------------------------|------------------------------------------------------------------------------------------------------------------------------------------|
| Compounds               | $[\text{}^{164}\text{Dy}_{0.02}\text{Y}_{0.98}(\text{tta})_3(\text{L})]$<br>$^{164}\text{Dy}_{0.02}\text{Y}_{0.98}(\text{m})$            |
| Formula                 | $\text{C}_{44}\text{H}_{26}\text{Y}_{0.98}\text{Dy}_{0.02}\text{F}_9\text{N}_2\text{O}_6\text{S}_{10}$                                   |
| M / g.mol <sup>-1</sup> | 1407.15                                                                                                                                  |
| Crystal system          | Monoclinic                                                                                                                               |
| Space group             | /                                                                                                                                        |
| Cell parameters         | a = 11.9472(20) Å<br>b = 25.9495(42) Å<br>c = 18.4933(28) Å<br>$\alpha = 90^\circ$<br>$\beta = 93.1124(83)^\circ$<br>$\gamma = 90^\circ$ |
| Volume / Å <sup>3</sup> | 5754.9(22)                                                                                                                               |
| Z                       | 4                                                                                                                                        |
| T / K                   | 150 (2)                                                                                                                                  |

**Table S15.** Best fitted parameters ( $\chi_T$ ,  $\chi_S$ ,  $\tau$  and  $\alpha$ ) with the extended Debye model for  $^{164}\text{Dy}_{0.07}\text{Y}_{0.93}(\text{m})$  at 0 kOe in the temperature range 3.5-20 K.

| T / K | $\chi_T / \text{cm}^3 \text{mol}^{-1}$ | $\chi_S / \text{cm}^3 \text{mol}^{-1}$ | $\alpha$ | $\tau / \text{s}$ | R <sup>2</sup> |
|-------|----------------------------------------|----------------------------------------|----------|-------------------|----------------|
| 3.5   | 0.28897                                | 0.02135                                | 0.53961  | 4.56019           | 0.99883        |
| 4     | 0.23746                                | 0.02059                                | 0.46937  | 1.7317            | 0.99867        |
| 4.5   | 0.19017                                | 0.01945                                | 0.39038  | 0.65295           | 0.99779        |
| 5     | 0.15959                                | 0.01877                                | 0.31411  | 0.3111            | 0.99823        |
| 5.5   | 0.14015                                | 0.01778                                | 0.25909  | 0.17565           | 0.99838        |
| 6     | 0.12613                                | 0.0167                                 | 0.21999  | 0.1079            | 0.99863        |
| 7     | 0.10632                                | 0.01475                                | 0.16816  | 0.04706           | 0.99911        |
| 8     | 0.09231                                | 0.01326                                | 0.13582  | 0.02292           | 0.9993         |
| 9     | 0.08183                                | 0.01187                                | 0.12001  | 0.01209           | 0.99955        |
| 10    | 0.07414                                | 0.01095                                | 0.11132  | 0.00692           | 0.99959        |
| 11    | 0.06732                                | 0.00972                                | 0.10789  | 0.00406           | 0.99974        |
| 12    | 0.06136                                | 0.00881                                | 0.11189  | 0.00241           | 0.99963        |
| 13    | 0.05665                                | 0.00837                                | 0.1066   | 0.00157           | 0.9996         |
| 14    | 0.05272                                | 0.00817                                | 0.09962  | 0.00107           | 0.99974        |
| 15    | 0.04924                                | 0.00775                                | 0.09912  | 7.32E-04          | 0.99977        |

|    |         |         |         |          |         |
|----|---------|---------|---------|----------|---------|
| 16 | 0.04624 | 0.00761 | 0.09637 | 5.12E-04 | 0.99984 |
| 17 | 0.0435  | 0.00763 | 0.09134 | 3.59E-04 | 0.99982 |
| 18 | 0.0411  | 0.00744 | 0.08613 | 2.44E-04 | 0.99986 |
| 19 | 0.03896 | 0.00838 | 0.07873 | 1.68E-04 | 0.99982 |
| 20 | 0.03697 | 0.01019 | 0.05207 | 1.18E-04 | 0.99992 |

**Table S16.** Best fitted parameters ( $\chi_T$ ,  $\chi_S$ ,  $\tau$  and  $\alpha$ ) with the extended Debye model for  $^{164}\text{Dy}_{0.07}\text{Y}_{0.93}(\text{m})$  at 1 kOe in the temperature range 4-20 K.

| T / K | $\chi_T / \text{cm}^3 \text{mol}^{-1}$ | $\chi_S / \text{cm}^3 \text{mol}^{-1}$ | $\alpha$ | $\tau / \text{s}$ | $R^2$   |
|-------|----------------------------------------|----------------------------------------|----------|-------------------|---------|
| 4     | 0.20944                                | 0.01982                                | 0.23701  | 3.82753           | 0.99914 |
| 4.5   | 0.17448                                | 0.01779                                | 0.20736  | 1.49301           | 0.99759 |
| 5     | 0.15209                                | 0.01664                                | 0.1752   | 0.69605           | 0.99965 |
| 5.5   | 0.13651                                | 0.01508                                | 0.15912  | 0.36537           | 0.99924 |
| 6     | 0.12349                                | 0.01432                                | 0.13736  | 0.20728           | 0.99947 |
| 7     | 0.10497                                | 0.01262                                | 0.11532  | 0.07858           | 0.99952 |
| 8     | 0.09141                                | 0.01157                                | 0.10048  | 0.03456           | 0.99977 |
| 9     | 0.08136                                | 0.01048                                | 0.09587  | 0.01684           | 0.99979 |
| 10    | 0.07395                                | 0.00903                                | 0.10421  | 0.00892           | 0.99959 |
| 11    | 0.06706                                | 0.00869                                | 0.10297  | 0.00501           | 0.99972 |
| 12    | 0.061                                  | 0.00824                                | 0.09775  | 0.00287           | 0.99981 |
| 13    | 0.05645                                | 0.00795                                | 0.09355  | 0.00184           | 0.99977 |
| 14    | 0.05253                                | 0.00742                                | 0.09966  | 0.0012            | 0.99974 |
| 15    | 0.04907                                | 0.00732                                | 0.09554  | 8.12971E-4        | 0.99979 |
| 16    | 0.04603                                | 0.00696                                | 0.09591  | 5.54472E-4        | 0.99981 |
| 17    | 0.04334                                | 0.00737                                | 0.08583  | 3.84809E-4        | 0.99986 |
| 18    | 0.04095                                | 0.0076                                 | 0.08447  | 2.63957E-4        | 0.99989 |
| 19    | 0.0388                                 | 0.00868                                | 0.06719  | 1.79732E-4        | 0.99989 |
| 20    | 0.03692                                | 0.00953                                | 0.05651  | 1.17876E-4        | 0.99994 |

**Table S17.** Best fitted parameters ( $\chi_T$ ,  $\chi_S$ ,  $\tau$  and  $\alpha$ ) with the extended Debye model for  $^{164}\text{Dy}_{0.05}\text{Eu}_{0.95}(\text{t})$  at 0 Oe in the temperature range 3-19 K.

| T / K | $\chi_T / \text{cm}^3 \text{mol}^{-1}$ | $\chi_S / \text{cm}^3 \text{mol}^{-1}$ | $\alpha$ | $\tau / \text{s}$ | $R^2$   |
|-------|----------------------------------------|----------------------------------------|----------|-------------------|---------|
| 3     | 0.32745                                | 0.0219                                 | 0.55768  | 4.7847            | 0.99849 |
| 3.5   | 0.2667                                 | 0.02239                                | 0.48272  | 1.84518           | 0.99856 |
| 4     | 0.22131                                | 0.02212                                | 0.40882  | 0.79788           | 0.99833 |
| 4.5   | 0.19049                                | 0.02128                                | 0.34893  | 0.40333           | 0.99804 |
| 5     | 0.16857                                | 0.02057                                | 0.30179  | 0.2296            | 0.99833 |
| 5.5   | 0.15199                                | 0.01964                                | 0.26733  | 0.13965           | 0.9985  |
| 6     | 0.13881                                | 0.01891                                | 0.23997  | 0.08944           | 0.99871 |
| 7     | 0.12041                                | 0.01701                                | 0.21647  | 0.04145           | 0.99885 |
| 8     | 0.10519                                | 0.01579                                | 0.18671  | 0.02037           | 0.99914 |
| 9     | 0.09367                                | 0.01519                                | 0.16548  | 0.01087           | 0.99932 |
| 10    | 0.08471                                | 0.01444                                | 0.154    | 0.00616           | 0.99943 |
| 11    | 0.07749                                | 0.01394                                | 0.14533  | 0.00368           | 0.99947 |
| 12    | 0.07108                                | 0.01348                                | 0.13995  | 0.00222           | 0.99953 |
| 13    | 0.06609                                | 0.0131                                 | 0.13782  | 0.00146           | 0.99965 |
| 14    | 0.0619                                 | 0.01346                                | 0.1284   | 9.98E-04          | 0.99968 |
| 15    | 0.0596                                 | 0.01626                                | 0.11156  | 7.11E-04          | 0.99971 |
| 16    | 0.05629                                | 0.01632                                | 0.09894  | 4.93E-04          | 0.99981 |
| 17    | 0.05343                                | 0.01531                                | 0.11818  | 3.37E-04          | 0.99977 |
| 18    | 0.05088                                | 0.01823                                | 0.07476  | 2.61E-04          | 0.99982 |
| 19    | 0.04849                                | 0.01734                                | 0.07153  | 1.69E-04          | 0.99992 |

**Table S18.** Best fitted parameters ( $\chi_T$ ,  $\chi_S$ ,  $\tau$  and  $\alpha$ ) with the extended Debye model for  $^{164}\text{Dy}_{0.05}\text{Eu}_{0.95}(\text{t})$  at 1 kOe in the temperature range 3-19 K.

| T / K | $\chi_T / \text{cm}^3 \text{mol}^{-1}$ | $\chi_S / \text{cm}^3 \text{mol}^{-1}$ | $\alpha$ | $\tau / \text{s}$ | $R^2$   |
|-------|----------------------------------------|----------------------------------------|----------|-------------------|---------|
| 3.5   | 0.37304                                | 0.01799                                | 0.50097  | 53.16273          | 0.99714 |
| 4     | 0.20745                                | 0.01846                                | 0.38522  | 4.66489           | 0.99616 |
| 4.5   | 0.16482                                | 0.01824                                | 0.31121  | 1.47549           | 0.99588 |
| 5     | 0.14272                                | 0.0181                                 | 0.26049  | 0.66428           | 0.99685 |
| 5.5   | 0.12779                                | 0.01747                                | 0.23079  | 0.34483           | 0.99733 |
| 6     | 0.11618                                | 0.01704                                | 0.2074   | 0.1951            | 0.9978  |
| 7     | 0.10143                                | 0.01592                                | 0.19252  | 0.07673           | 0.99819 |
| 8     | 0.0883                                 | 0.01526                                | 0.16491  | 0.03302           | 0.99847 |
| 9     | 0.07872                                | 0.01475                                | 0.14752  | 0.01593           | 0.99904 |
| 10    | 0.07125                                | 0.01424                                | 0.13297  | 0.00841           | 0.99945 |
| 11    | 0.06523                                | 0.01385                                | 0.12484  | 0.00472           | 0.99956 |
| 12    | 0.05996                                | 0.01366                                | 0.11559  | 0.00274           | 0.99961 |
| 13    | 0.05588                                | 0.0135                                 | 0.11563  | 0.00171           | 0.9997  |
| 14    | 0.05253                                | 0.01354                                | 0.10585  | 0.00116           | 0.99961 |
| 15    | 0.04937                                | 0.01354                                | 0.09962  | 7.82E-04          | 0.99981 |
| 16    | 0.04668                                | 0.01313                                | 0.09935  | 5.26E-04          | 0.9997  |
| 17    | 0.04429                                | 0.01283                                | 0.09459  | 3.67E-04          | 0.99976 |
| 18    | 0.04207                                | 0.01503                                | 0.05187  | 2.70E-04          | 0.99976 |
| 19    | 0.04014                                | 0.01484                                | 0.0596   | 1.78E-04          | 0.99973 |

**Table S19.** Dynamic parameters collected above 10 K for the five previously investigated compounds at zero external field and at 1 kOe.

| Compound                                                          | $\tau_0$ (s)           | $\Delta$ (K) |
|-------------------------------------------------------------------|------------------------|--------------|
| <b>Dy(m)</b> 0 Oe                                                 | $1.0(1)\times 10^{-5}$ | 42(2)        |
| <b>Dy(m)</b> 1 kOe                                                | $2.7(4)\times 10^{-6}$ | 65(2)        |
| <b>Dy(t)</b> 0 Oe                                                 | $1.1(2)\times 10^{-5}$ | 57(3)        |
| <b>Dy(t)</b> 1 kOe                                                | $1.2(3)\times 10^{-6}$ | 96(4)        |
| <sup>164</sup> <b>Dy(m)</b> 0 Oe                                  | $8.4(2)\times 10^{-6}$ | 41(2)        |
| <sup>164</sup> <b>Dy(m)</b> 1 kOe                                 | $2.4(6)\times 10^{-6}$ | 60(2)        |
| <b>Dy<sub>0.02</sub>Y<sub>0.98</sub>(m)</b> 0 Oe                  | $4.5(7)\times 10^{-6}$ | 76(2)        |
| <b>Dy<sub>0.02</sub>Y<sub>0.98</sub>(m)</b> 1 kOe                 | $2.9(7)\times 10^{-6}$ | 82(3)        |
| <sup>164</sup> <b>Dy<sub>0.07</sub>Y<sub>0.93</sub>(m)</b> 0 Oe   | $3.2(6)\times 10^{-6}$ | 82(3)        |
| <sup>164</sup> <b>Dy<sub>0.07</sub>Y<sub>0.93</sub>(m)</b> 1 kOe  | $2.4(6)\times 10^{-6}$ | 84(4)        |
| <sup>164</sup> <b>Dy<sub>0.05</sub>Eu<sub>0.95</sub>(t)</b> 0 Oe  | $4.4(9)\times 10^{-6}$ | 74(3)        |
| <sup>164</sup> <b>Dy<sub>0.05</sub>Eu<sub>0.95</sub>(t)</b> 1 kOe | $3.3(7)\times 10^{-6}$ | 80(3)        |

## References

---

- 1 A. I. Vooshin, N. M. Shavaleev, V. P. Kazakov, *J. Luminescence* 2000, **91**, 49.
- 2 R. D. McCullough, M. A. Petruska, J. A.; Belot, *Tetrahedron* 1999, **55**, 9979.
- 3 X. Wang, P. Rabbat, P. O'Shea, R. Tillyer, E. J. J. Grabowski, P. J. Reider, *Tetrahedron. Lett.* 2000, **41**, 4335.
- 4 X. Chen, F. J. Femia, J. W. Babich, J. Zubiet, *Inorg. Chim. Acta* 2001, **314**, 91.
- 5 SHELX97 - Programs for Crystal Structure Analysis (Release 97-2). Sheldrick, G. M. Institut für Anorganische Chemie der Universität, Tammanstrasse 4, D-3400 Göttingen, Germany, 1998. SIR97 – A. Altomare, M. C. Burla, M. Camalli, G. L. Cascarano, C. Giacovazzo, A. Guagliardi, A. G. G. Moliterni, G. Polidori, R. Spagna, *J. Appl. Cryst.* 1999, **32**, 115.
- 6 F. Aquilante, L. De Vico, N. Ferré, G. Ghigo, P.A. Malmqvist, P. Neogrady, T. Bondo Pedersen, M. Pitonak, M. Reiher, B. O. Roos, L. Serrano-Andrés, M. Urban, V. Veryazov, R. Lindh, *J. Comput. Chem.* 2010, **31**, 224.
- 7 B. O. Roos, P. R. Taylor, P. E. M. Siegbahn, *Chem. Phys.* 1980, **48**, 157.
- 8 P. A. Malmqvist, B. O. Roos, B. Schimmelpfennig, *Chem. Phys. Lett.* 2002, **357**, 230.
- 9 P. A. Malmqvist, B. O. Roos, *Chem. Phys. Lett.* 1989, **155**, 189.
- 10 L. F. Chibotaru, L. Ungur, A. Soncini, *Angew. Chem., Int. Ed.* 2008, **47**, 4126.
- 11 F. Aquilante, P.-A. Malmqvist, T.-B. Pedersen, A. Ghosh, B. O. Roos, *J. Chem. Theory Comput.* 2008, **4**, 694.
- 12 B. O. Roos, R. Lindh, P.-A. Malmqvist, V. Veryazov, P.-O. Widmark, *J. Phys. Chem. A* 2004, **108**, 2851.
- 13 B. O. Roos, R. Lindh, P.-A.; Malmqvist, V. Veryazov, P.-O. Widmark, *J. Phys. Chem. A* 2005, **109**, 6576.
- 14 B. O. Roos, R. Lindh, P.-A. Malmqvist, V. Veryazov, P.-O. Widmark, A. C. Borin, *J. Phys. Chem. A* 2008, **112**, 11431.
